# Supplementary material
Source: PubMed Central journal article supplement (PMC4485132)
Supplement: pnas.1423344112.sapp.pdf [file pnas.1423344112.sapp.pdf]

## SI Appendix

### SI Materials and Methods

**Reagents.** Akt inhibitor VIII, KU-0063794, GDC-0941, PI-103 and Y-27632 were obtained from Chemdea. KN-93, KN-62, PD-168393, PD-153035, ERK inhibitor, ERK inhibitor II, U0126, PF-4708671, DG2, Gö-6976, bisindolylmaleimide-1, okadaic acid, cantharidic acid, and H-1152 were obtained from Calbiochem (Merck). GSK-1120212 and MK-2206 were obtained from Selleckchem. Torin-1 was obtained from Axon Medchem. Human recombinant EGF (AF-100-15) and IGF-1 (100-11) were purchased from Peprtech.

**Cell-lines.** MCF7 cells (identity confirmed by genotyping analysis) were routinely maintained in DMEM (supplemented with 10% fetal-bovine serum and 100 U.mL<sup>-1</sup> penicillin/streptomycin) at 37°C in a humidified atmosphere at 5% CO<sub>2</sub>. Resistant MCF7 cell-lines, derived from the original parental cells, were obtained by gradually increasing the concentrations of GDC-0941 or KU-0063794 concentrations (starting at 100 nM up to a maximum of 1 µM) over a period of approximately six months. The resultant clones (MCF7-G1:G3 and MCF7-K1:K3) were then routinely maintained as above in the presence of either 1 µM GDC-0941 or KU-0063794 (in DMSO) for MCF7-G and MCF7-K cells, respectively.

**Cell lysis and protein digestion.** Cells were split and seeded at 4 x 10<sup>5</sup> cells.plate<sup>-1</sup>, 72 hours prior to the experiment. The medium in each plate was replaced 24 hours prior to the experiment. Each experiment was performed in biological duplicate. For the network definition experiments, cells were treated with each of the inhibitors or vehicle (DMSO) for 1 hour (Table S1). For the growth factor stimulation experiments, cells were starved for 24h and were subsequently treated with either 50 ng.mL<sup>-1</sup> EGF or IGF for 0, 5, 10, 30, or 60 minutes. For the resistant cell-line experiments, no additional treatments were performed. For the rewiring experiments in the MCF7-P and -G1:3 cell-lines, cells were starved for 24h and subsequently treated with 50 ng.mL<sup>-1</sup> EGF for 0, 30, 60, or 120 minutes. Following the treatments, cells were washed three times with ice-cold phosphate-buffered saline supplemented with 1 mM Na<sub>3</sub>VO<sub>4</sub> and 1 mM NaF, and lysed with urea lysis buffer [8M urea in 20 mM HEPES (pH 8.0), supplemented with 1 mM Na<sub>3</sub>VO<sub>4</sub>, 1 mM NaF, 1 mM Na<sub>2</sub>P<sub>2</sub>H<sub>2</sub>O<sub>7</sub>, and 1 mM β-glycerol phosphate]. Lysates were further homogenized by probe sonication (three 10s pulses) and insoluble material removed by centrifugation. Protein concentration was estimated using the Bradford or Smith assay. After normalizing each condition to a common protein concentration (250 or 500 µg), each sample was reduced and alkylated by sequential incubation with 10 mM dithiothreitol and 16.6 mM iodoacetamide for 30 min at room temperature, in the dark. For protein digestion, the urea concentration was reduced to 2M by the addition of 20 mM HEPES (pH 8.0). Immobilised tosyl-lysine chloromethyl ketone (TLCK)-trypsin [20 p-toluenesulfonyl-L-arginine methyl ester (TAME) units.mg<sup>-1</sup>] was then added, and

samples incubated overnight at 37°C. Trypsin beads were removed by centrifugation and the resultant peptide solutions desalted with 30 mg Oasis-HLB cartridges (Waters, Manchester, UK), using a vacuum manifold. Briefly, Oasis cartridges were conditioned with acetonitrile (ACN) and equilibrated with wash solution (0.1% TFA, 1% ACN). Peptides were loaded into the cartridges and washed with 1 mL wash solution. Finally, peptides were eluted with glycolic acid buffer 1 (1M glycolic acid, 5% TFA, 50% ACN). When analyzing total protein, aliquots of the parental and original resistant cell-line lysates were taken and processed as above with the exception that the samples were eluted from the OASIS cartridges with 60% ACN (40% H<sub>2</sub>O), dried-down using a SpeedVac, and stored at -80°C until further analysis.

**Phosphopeptide enrichment.** Phosphorylated peptides were enriched using TiO<sub>2</sub> (GL Sciences) similarly to that previously described (1, 2) with some modifications outlined in supplementary Methods. Briefly, peptide eluents were normalized with glycolic acid buffer 2 (1M glycolic acid, 5% TFA, 80% ACN) and incubated with 50 µL of TiO<sub>2</sub> (a 50% slurry in 1% TFA), for 5 min at room temperature. Beads were pelleted by centrifugation, 80% of the supernatant removed and stored on ice. The remaining solution was used to re-suspend the beads, and the beads packed into pre-washed, empty, PE-filtered spin-tips (Glygen, MD, USA) by centrifugation. Residual beads were re-suspended with a further glycolic acid buffer 2 and packed into the tips. The remaining peptide solution was removed from ice and washed over the packed TiO<sub>2</sub> beads by centrifugation. The packed tips were then sequentially washed with glycolic acid buffer 2, ammonium acetate buffer (100 mM ammonium acetate; 25% ACN), and 10% ACN, the latter being repeated in triplicate. Phosphopeptides were eluted by centrifugation with four sequential washes of 5% NH<sub>4</sub>OH in 10% ACN. The resulting phosphopeptide solutions were snap-frozen, dried in a SpeedVac, and stored at -80°C.

**LC-MS/MS phosphoproteomics analysis.** Dried phosphopeptide extracts were re-suspended in 20 µL of 0.1% TFA (5% ACN) containing 20 fmol.µL<sup>-1</sup> enolase digest (Waters, Manchester, UK). For each technical replicate, 3.0 µL of each sample was loaded into a Dionex Ultimate nRSLC 3000 LC system (Thermo Fisher Scientific) coupled online to an LTQ-Orbitrap-Velos mass spectrometer (Thermo Fisher Scientific). The samples were separated on an 85 min linear gradient between 5 and 35% ACN on a Acclaim PepMap RSLC column (25 cm x 75 µm, 2 µm, 100 Å), and the top seven most intense multiply charged ions in each MS<sup>1</sup> scan were selected for collision-induced dissociation fragmentation (with multistage activation enabled). The resolution of the MS<sup>1</sup> was set to 30,000 FWHM. Each sample was run in triplicate.

**LC-MS/MS proteomics analysis.** Dried peptide extracts were re-suspended to a final concentration of 0.5 µg.µL<sup>-1</sup> in 0.1% TFA, 3% ACN. For each technical replicate, 4.0 µL of each sample was loaded into the LC-MS/MS system described above. The samples were separated on a 120 minute linear gradient between 3 and 32% ACN, and the top ten most intense multiply charged ions in each MS<sup>1</sup> scan were selected

for collision-induced dissociation fragmentation. The resolution of the MS<sup>1</sup> was set to 30,000 FWHM. Each sample was run in duplicate.

**Phosphopeptide identification and quantification.** Peptide identification was performed by matching deisotoped, MS/MS data to the Uniprot-Swissprot human protein databases (October 2012 release, containing 20,233 entries), utilizing the Mascot server version 2.3. Mascot Distiller version 2 was used to generate peak lists in the mascot generic format. The samples were also searched against a scrambled version of the former database. Mass tolerances were set to 10 ppm and 600 mmu for the precursor and fragment ions respectively. For the phosphoproteomics experiments, allowed variable modifications were phospho-Ser, phospho-Thr, phospho-Tyr, pyro-Glu (N-terminal), and oxidation-Met. The identified phosphopeptides from each of the samples were collated, curated, and a false-discovery rate calculated (by comparison to the scrambled database) using in-house scripts. Unique phosphopeptides ions with FDR < 5% were then included in the subsequent analyses. Using these settings >95% of peptides had a probability of FDR <1% (Fig. S1). The databases from the growth factor and resistant cell-line experiments were merged with the original network discovery database to ensure addition of the identified activity markers. Peptide quantification was performed as described before by our group (1-4) and others (5, 6). Briefly, Pescal software (written in Python v2.7) was used to obtain peak heights of extracted ion chromatograms of each of the phosphopeptide ions in the database, across all of the samples being compared. The retention times of each phosphopeptide ion in each sample were predicted by aligning the enolase standard peptides spiked into each sample, using an in-house linear modeling algorithm, and the subsequent integration of chromatographic peaks obtained from extracted ion chromatograms for each phosphopeptide in each sample. This approach is similar to that reported for the alignment of retention times in multiplexed selected reaction monitoring experiments (7). The mass-to-charge ( $m/z$ ) and retention time ( $t_R$ ) tolerances were set to 7 ppm and 1.5 min, respectively. Proteomics data were processed as above; however, protein identity was inferred only for those possessing  $\geq 2$  peptides with Mascot peptide scores  $\geq 20$  and a Mascot protein score  $\geq 60$ .

**Statistical analysis and data visualization.** Following quantile normalization of the data (8), robust statistical analysis to assess the magnitude and significance of phosphorylation changes was performed using a linear modeling strategy and empirical Bayes shrinkage of standard deviations (9). The resulting  $P$ -values were then corrected for multiple testing using the Benjamini-Hochberg procedure. All of the described analysis was performed using the *limma* package (v3.16.2) within the R statistical computing environment (v3.0.0) (10, 11). The datasets were visualized using a combination of individual R packages, namely: *ggplot2*, *gplots*, *reshape2*, *igraph*, and *RCytoscape*, (12-16). Network graphs were constructed within the Cytoscape software package (v2.8.3) (17) and randomized using the *BiRewire* R package (18). Log<sub>2</sub> stoichiometry fold-ratios were calculated by subtracting the

calculated  $\log_2$  ratio (vs control) of the total protein from the  $\log_2$  fold-ratio (vs control) of the individual phosphorylation site.

**Kinase-substrate enrichment analysis and motif analysis.** The abundance of each of the identified markers was monitored systematically using KSEA (kinase-substrate enrichment analysis), as described previously (1). Briefly, the phosphopeptide ions identified within the growth factor and resistant cell-line experiments that were previously identified as being CTAMs were systematically extracted from the dataset. The mean of the  $\log_2$  fold-ratios (versus control) of the phosphorylation sites representing each CTAM group were then calculated alongside the standard deviation ( $\delta$ ) for each mean. The significance of enrichment was then determined using a Z-score based approach and expressed as *P*-values, using the following formula:  $Z = (S_m - \mu_t) \cdot m^{1/2} / \delta_t$ ; where  $S_m$  = mean of the CTAM group  $\log_2$  fold-ratios;  $\mu_t$  = mean of the total dataset  $\log_2$  ratios;  $m$  = number of individual phosphopeptides within the CTAM group; and  $\delta_t$  = standard deviation of the total dataset  $\log_2$  ratios (vs control) (19). The motif analyses were performed as in (1). Briefly, the phosphopeptides under investigation were first grouped according to which consensus/common motif they represent. The mean  $\log_2$  fold-ratio (vs DMSO control) was then calculated for each motif group under each condition.

**CTAM identification algorithm.** Phosphorylation sites were first filtered to only include those possessing a Mascot  $\delta$ -score  $\geq 5$ . Activity markers for each kinase inhibitor were then identified by selecting phosphorylation sites with a  $\log_2$  fold-ratio  $\leq 1$  (i.e. a 50% linear reduction in abundance) and adjusted  $P \leq 0.1$ , or with those with a smaller change ( $\log_2$  fold-ratio  $\leq 0.75$ ), but greater significance (adjusted  $P \leq 0.05$ ) for each inhibitor. Phosphorylation sites that met the above thresholds under both inhibitor treatments targeting the same kinase were subsequently identified as compound-target activity markers (CTAMs).

**Cell viability assays.** Parental MCF7, G1:3 and K1:3 cell-lines were seeded in 96-well plates at a density of approximately 5,000 cells.well<sup>-1</sup>, in biological triplicate. After 24 hours, the cells were then treated with the indicated concentrations/combinations of GDC-0941, KU-0063794, MK-2206, KN-93, PD-153035, GSK-1120212 or DMSO (as Table S2). Following a 48 hour treatment with the inhibitors, cell proliferation was determined with the MTS assay (Promega, WI, USA) or crystal violet stain. For the MTS assays the absorbance (490 nm) of each well was determined using a spectrophotometer following a 120 min incubation with the reagent, this measurement being acquired in duplicate. For the crystal violet staining, cells were fixed with 100  $\mu$ L.well<sup>-1</sup> paraformaldehyde (4% w/v in PBS) for 30 min on ice, stained with 100  $\mu$ L.well<sup>-1</sup> crystal violet stain (0.5% w/v in 20% MeOH) for 10 min at room temperature and washed twice with ddH<sub>2</sub>O. Following the washes, the crystal violet was re-suspended using 100  $\mu$ L.well<sup>-1</sup> Sorensen's buffer (0.1M sodium citrate, 50% EtOH, pH 4.2) and the absorbance (540 nm) of each well measured in duplicate. The ratio of the absorbance of each concentration data-point

versus the absorbance of control (DMSO) treated cells was then calculated, log-transformed, and the mean of the each set of replicates calculated.

**Cell proliferation assays.** Parental MCF7, G1:3 and K1:3 cell-lines were seeded in 12-well plates at a density of approximately 80,000 cells.well<sup>-1</sup>, in biological triplicate. After the indicated time period, cells were washed with PBS, trypsinized and counted using a Beckman Coulter Vi-CELL XR cell counter. Second-order polynomials were fitted to the data using the *ggplot2* package (v0.9.3.1) within R (v3.0.0).

**Immunoblotting.** Cells were lysed in lysis buffer (50 mM Tris-HCl [pH 7.4], 1 mM EDTA, 150 mM NaCl, 1% Triton-X100; supplemented with 1 mM Na<sub>3</sub>VO<sub>4</sub>, 1 mM NaF, 1 mM β-glycerol phosphate, 2.5 mM Na<sub>2</sub>P<sub>2</sub>H<sub>2</sub>O<sub>7</sub>, 1 mM PMSF, and 1X protease inhibitor cocktail [Sigma Aldrich]). Samples were resolved by SDS-polyacrylamide gel electrophoresis using either 12% or 4-15% gradient precast gels (BioRad). Proteins were transferred to PVDF membranes using the BioRad Trans-Blot Turbo system as per manufacturer's instructions. Once transferred, membranes were blocked with 5% w/v skimmed milk powder in Tris-buffered saline supplemented with 0.1% Tween-20. Blocked membranes were incubated with primary and secondary antibodies and developed with SuperSignal West Pico Chemiluminescent Substrate (Thermo Scientific). Primary antibodies (Table S4) were used at 1:500 or 1:1000 dilution and secondary antibodies were used at 1:5000 dilution.

## Supplementary Figures

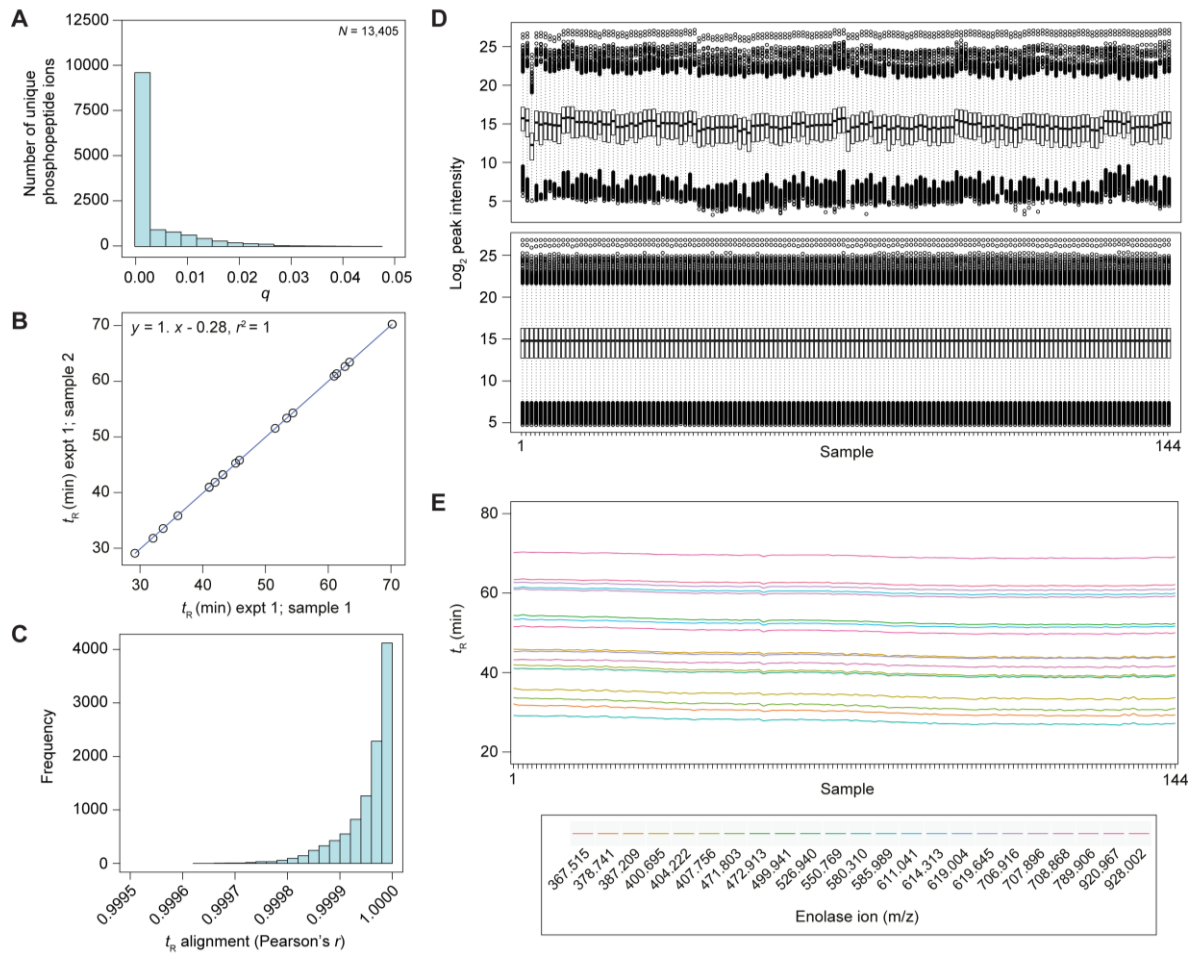

**Fig. S1. Data summary for the kinase inhibitor-treated phosphoproteomes that define the network.** This is a quality control analysis of the data shown in Fig. 1 and 2 in the main text. (A) Histogram showing the distribution of  $q$ -values within the phosphopeptide ion database (13,405 unique entries). (B) Box plots demonstrating the phosphopeptide ion  $\log_2$  intensity distributions for each sample pre- (top panel) and post-quantile normalization (bottom panel). (C) Illustrative example of an enolase peptide standard retention time ( $t_R$ ) alignment between two samples in order to predict and account for retention time shifts. (D) Histogram showing the distribution of Pearson's correlation coefficients ( $r$ ) for linear models formed between each pair-wise peptide standard alignment. (E) Line plot demonstrating the stability of enolase peptide standard retention times across the sample array. The color of each line is specific to a single enolase peptide ion (as denoted in the key).

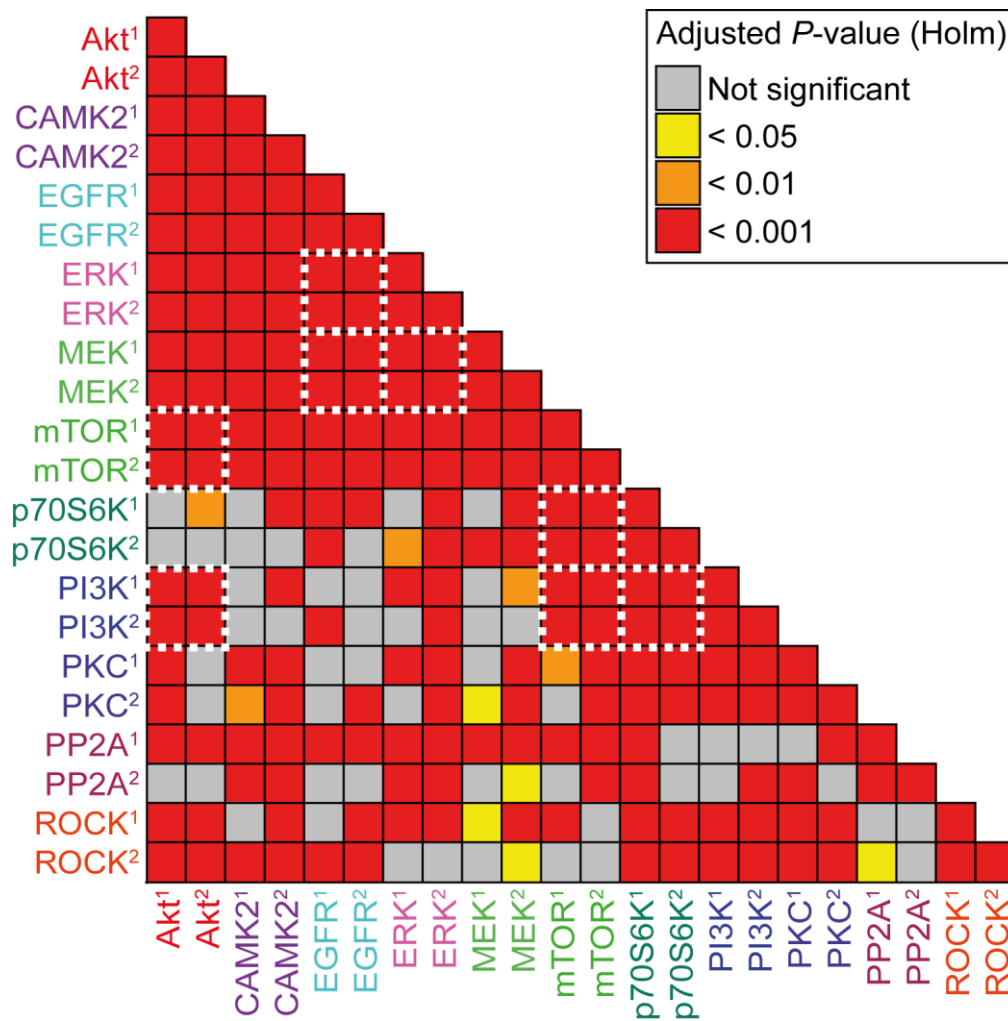

**Fig. S2. Statistical significance of the correlations between inhibitor treatments.** Heat map demonstrating the significance of correlation between each inhibitor treatment (based on the 4,651 phosphopeptide ions found to be significantly down-regulated by at least one inhibitor pair, as in Fig. 1C). The significance is expressed as an *P*-value (calculated from Pearson's *r* and adjusted for multiple testing using the Holm procedure) and color-coded accordingly. Known kinase-kinase relationships are highlighted with white, dashed boxes as in Fig. 1C.

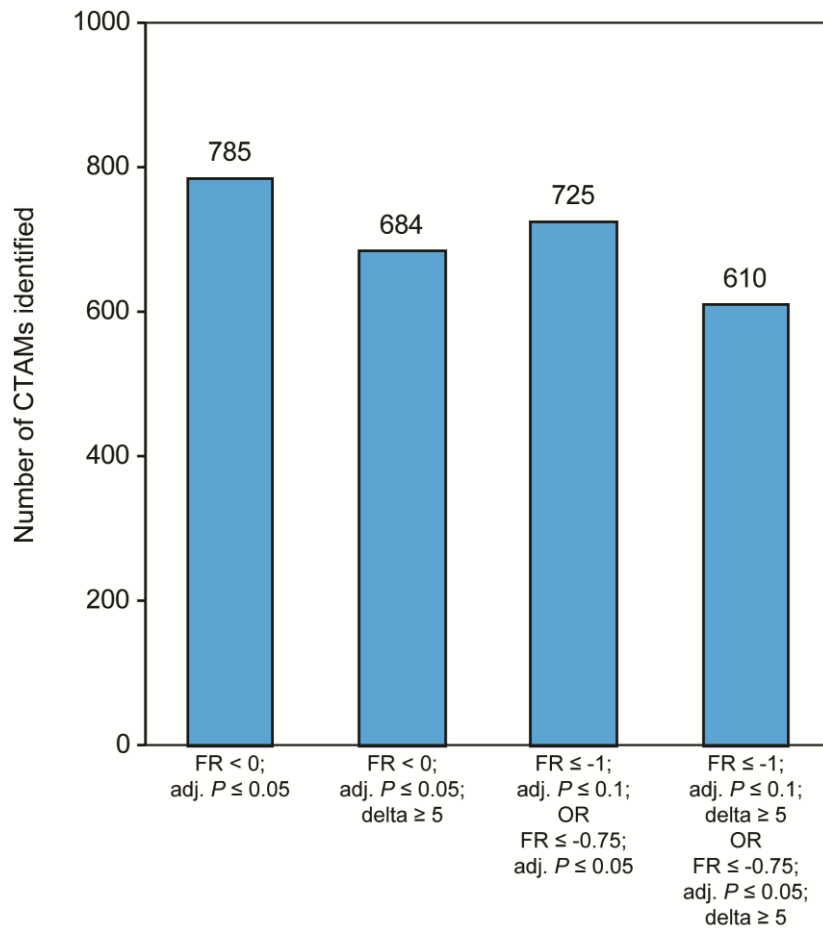

**Fig. S3. Number of identified CTAMs as a function of selected statistical thresholds.** Bars represent the number of CTAMs identified under the indicated threshold conditions. FR =  $\log_2$  fold-ratio; adj. *P* = Benjamini-Hochberg adjusted *P*-value; delta = Mascot delta ( $\delta$ ) score.



Proline-rich AKT1 substrate 1 (p-S183),  
 [S]LPVSVPVWGFK, AKT1S1 183 – 194, Phospho (ST),  
 Mascot score = 70.1, delta score = 40.77,  $m/z$  = 698.3588,  $z$  = 2,  $t_R$  ~ 80 min

— First isotope  
 — Second isotope  
 — Third isotope

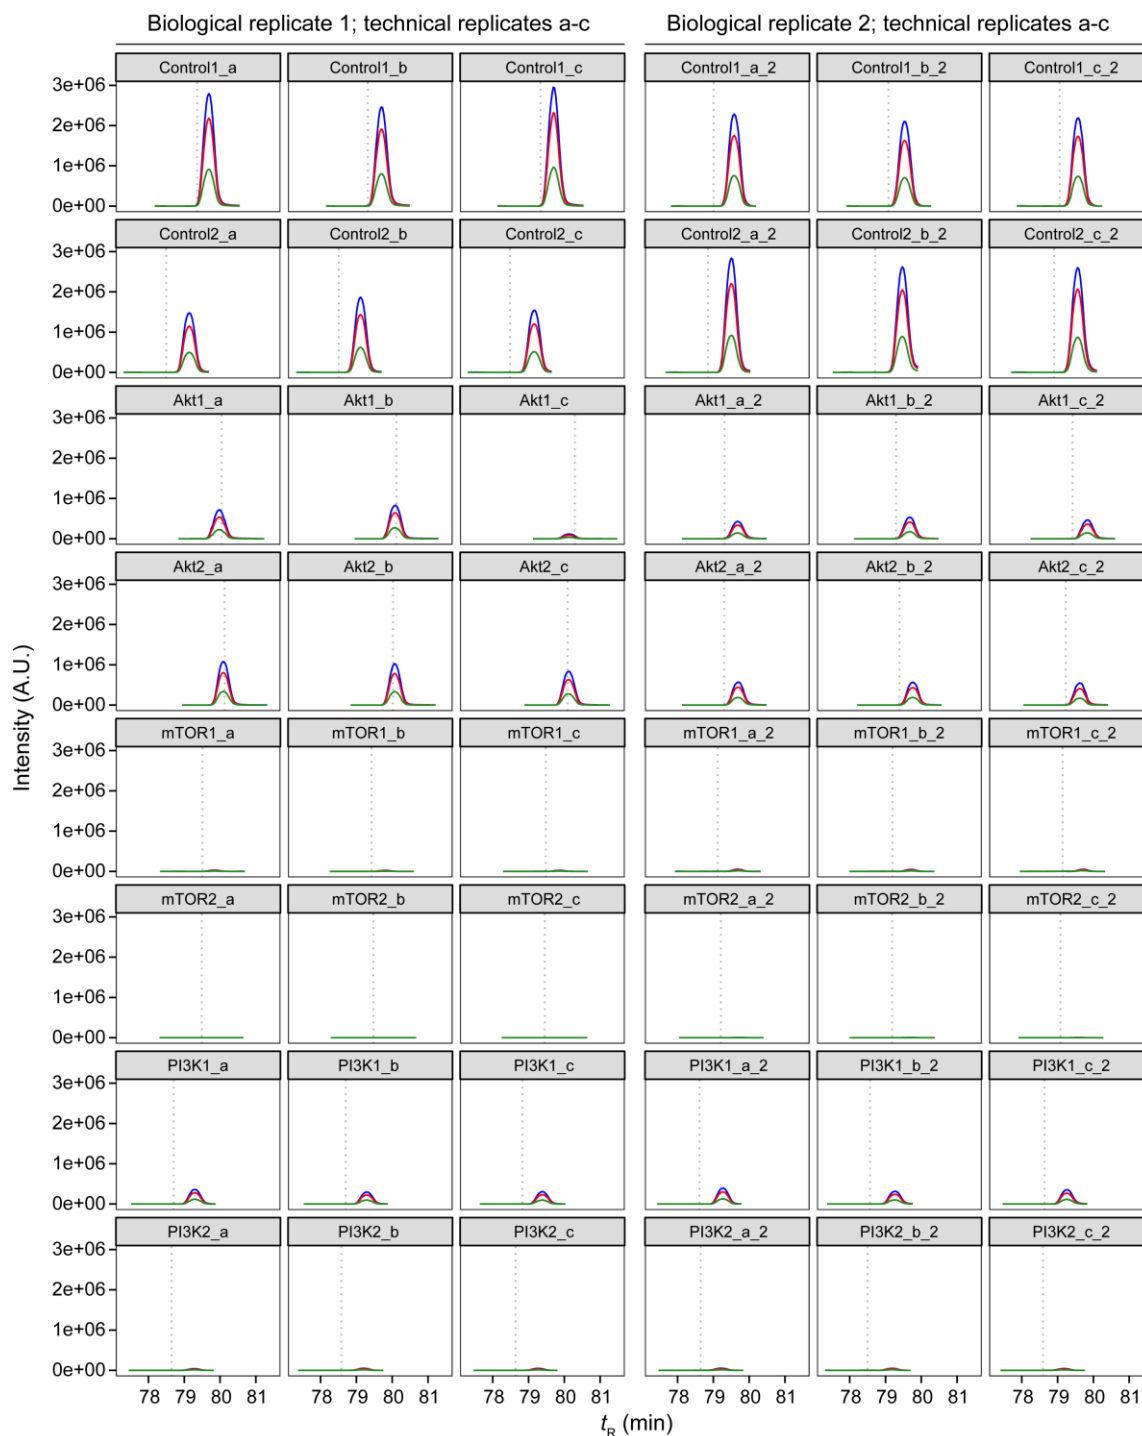

**Fig. S4. Example of MS raw data.** Raw MS data supports the identification of AKT1S as a member of the Akt-mTOR-PI3K CTAM group. Raw MS data extracted ion chromatograms (XICs) for the phosphopeptide representing AKT1S (S183) at  $m/z$  698.3588 ( $\pm 7$  ppm). Lines represent the temporal elution profiles of the first, second, and third isotopes as outlined in the key. Dotted lines represent the predicted retention time for the phosphopeptide in each sample. Akt1, Akt inhibitor VIII; Akt2, MK-2206; mTOR1, KU-0063794; mTOR2, Torin-1; PI3K1, GDC-0941; PI3K2, PI-103.

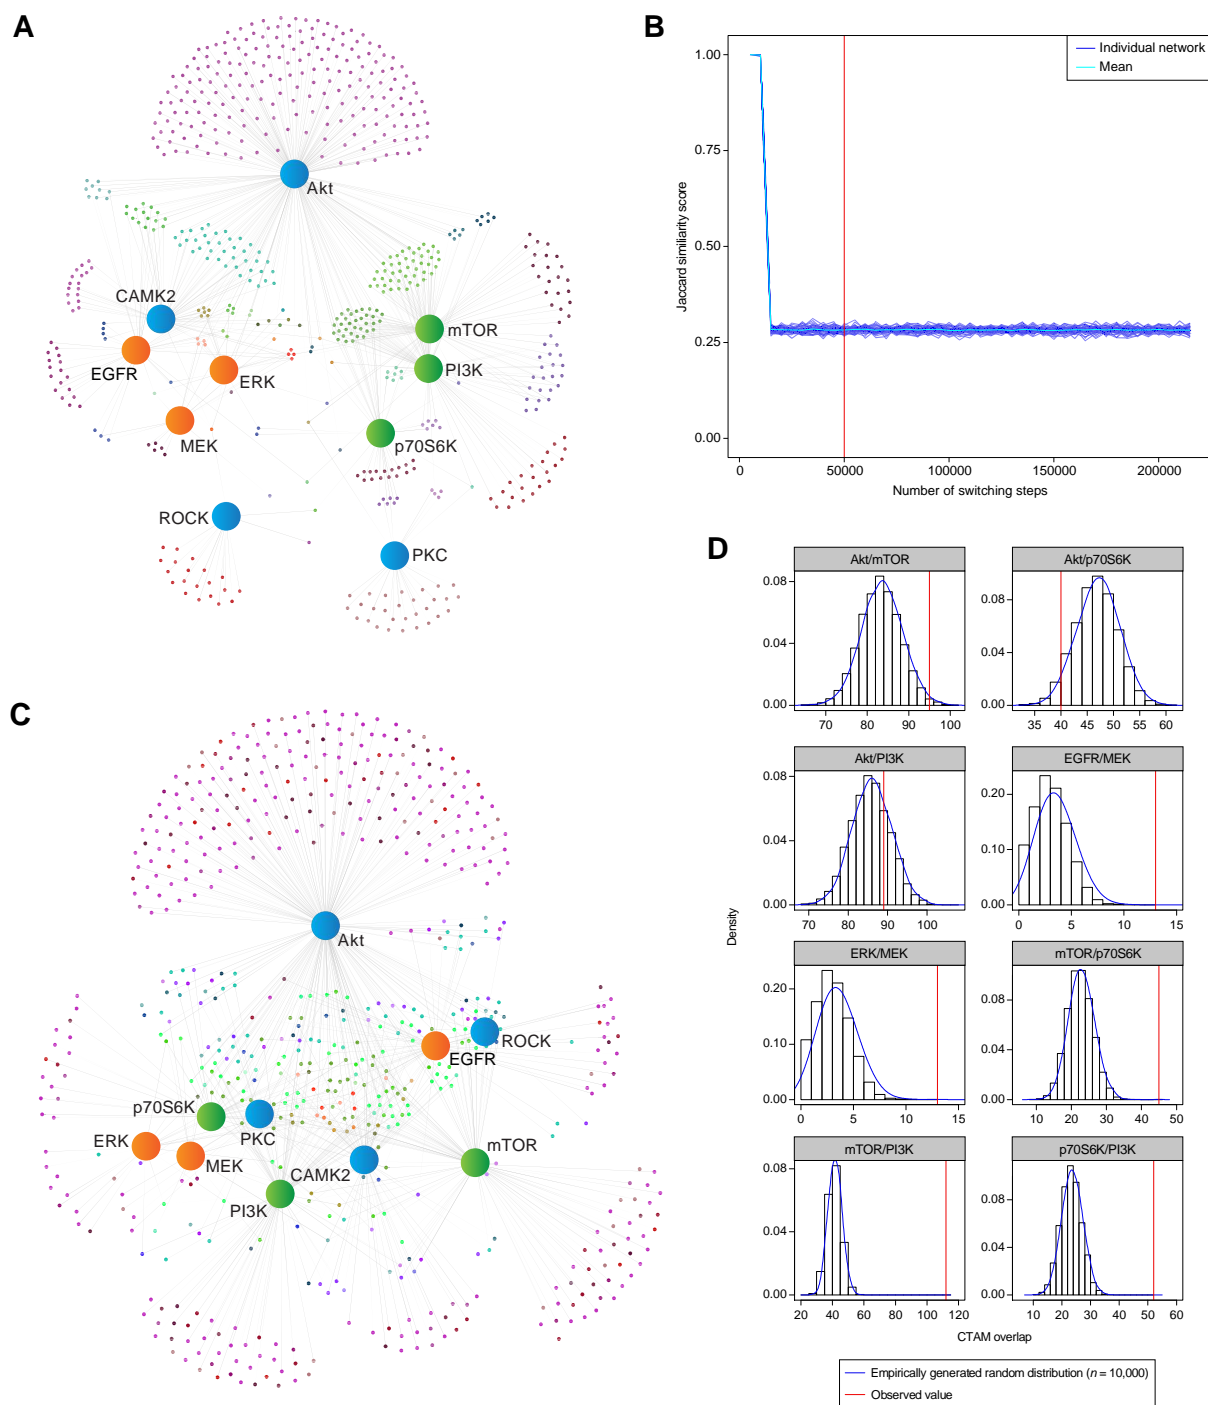

**Fig. S5. Randomization of the defined network's topology.** (A) Empirically defined kinase signaling network as shown in Fig. 2D. (B) Optimization of the number of switching steps required to produce networks least similar to the original. Red line, the number of switching steps used in subsequent network randomization attempts. (C) An illustrative example of one of the 10,000 randomized networks (produced using 50,000 switching steps). (D) Distribution of CTAM overlaps between the indicated kinases in the randomized networks. Blue line, probability density function of the overlaps observed in the 10,000 randomized networks (as in C); red line, overlap observed in the real network (as in A).

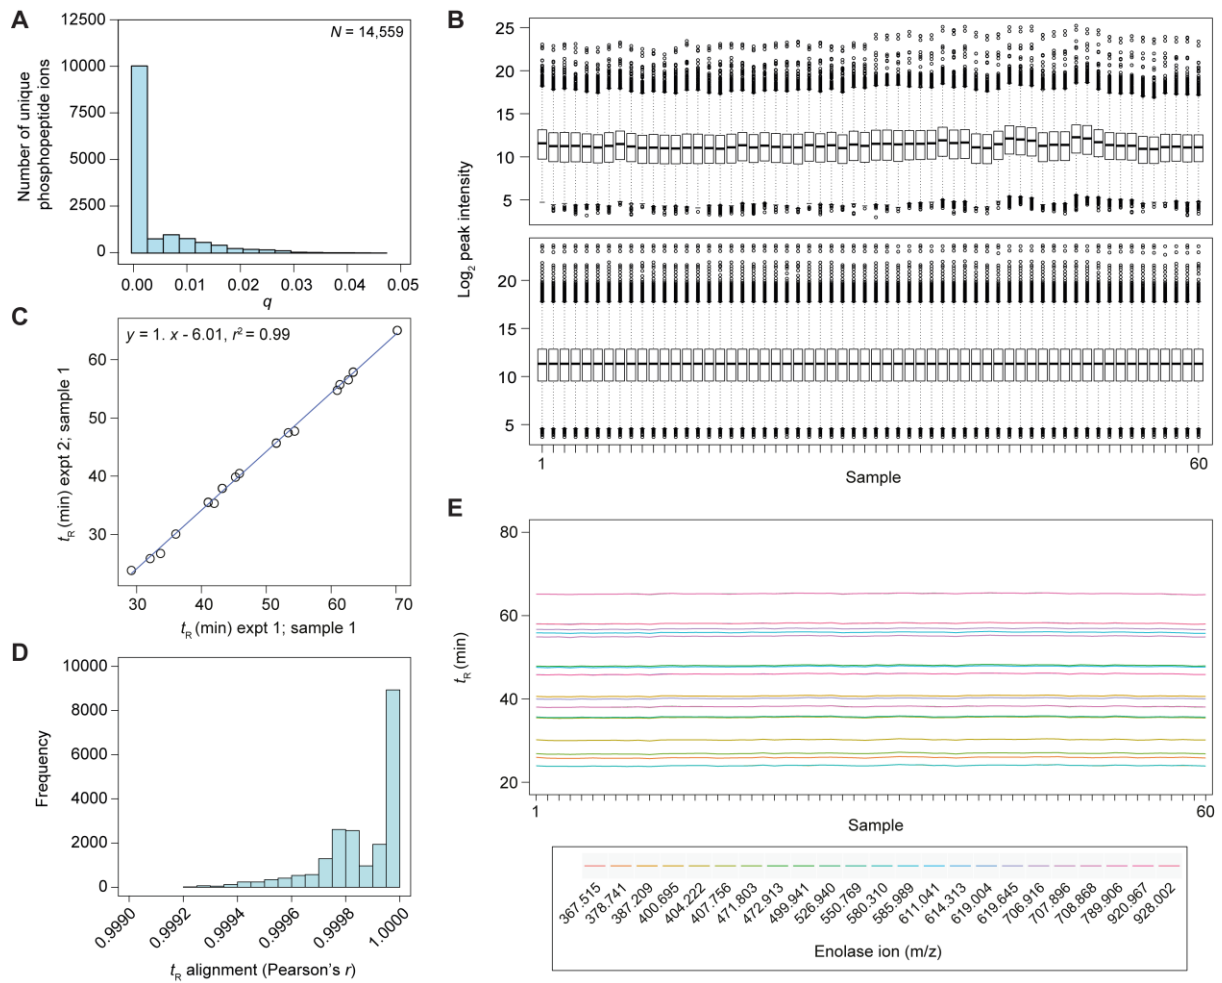

**Fig. S6. Data summary for the stimulation of MCF7 cells with growth factors.** This is a quality control analysis of the data shown in Fig. 3 in the main text. (A) Histogram showing the distribution of  $q$ -values within the phosphopeptide ion database (14,559 unique entries). (B) Box plots demonstrating the phosphopeptide ion  $\log_2$  intensity distributions for each sample pre- (top panel) and post-quantile normalization (bottom panel). (C) Illustrative example of an enolase peptide standard retention time ( $t_R$ ) alignment between two samples, one from the first, network-defining experiment (Fig S1 – expt 1) and one from the growth factor stimulation experiment (expt 2), in order to predict and account for retention time shifts. (D) Histogram showing the distribution of Pearson's correlation coefficients ( $r$ ) for linear models formed between each pair-wise peptide standard alignment in both the network-defining and growth factor experiments. (E) Stability of enolase peptide standard retention times across the sample array. The color of each line is specific to a single enolase peptide ion (as denoted in the key).

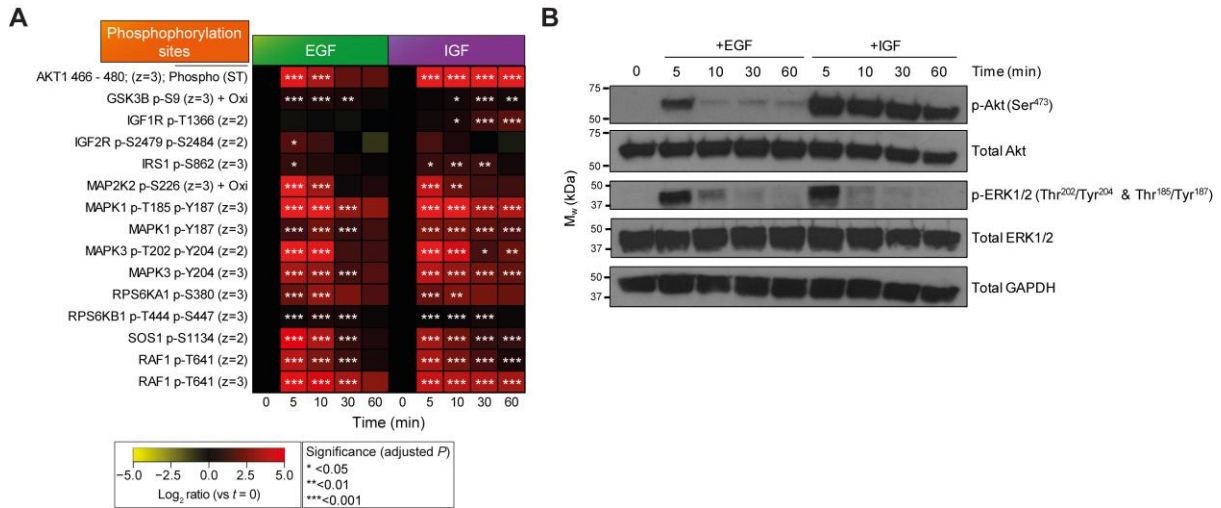

**Fig. S7. Illustrative examples of the dynamics of phosphorylation sites downstream of EGFR and IGF-1R.** Heat map showing the log<sub>2</sub> fold-ratios (vs  $t = 0$ ) for several phosphorylation sites known to be downstream of EGFR and IGF-1R following stimulation with either of the growth factors. Phosphorylation sites possessing a Mascot delta score  $\geq 10$  are presented as the protein name, peptide charge ( $z$ )  $\pm$  any other peptide modifications. Those possessing a Mascot delta score  $\leq 10$  are represented as the protein name, residues between which the phosphorylation site resides, peptide charge, and the predicted modification. Asterisks indicate statistical significance (adjusted  $P$ -value) as outlined in the legend. (B) Western blots for known EGF/IGF-sensitive phosphorylation sites activating the Akt-mTOR-PI3K and MAPK pathways.

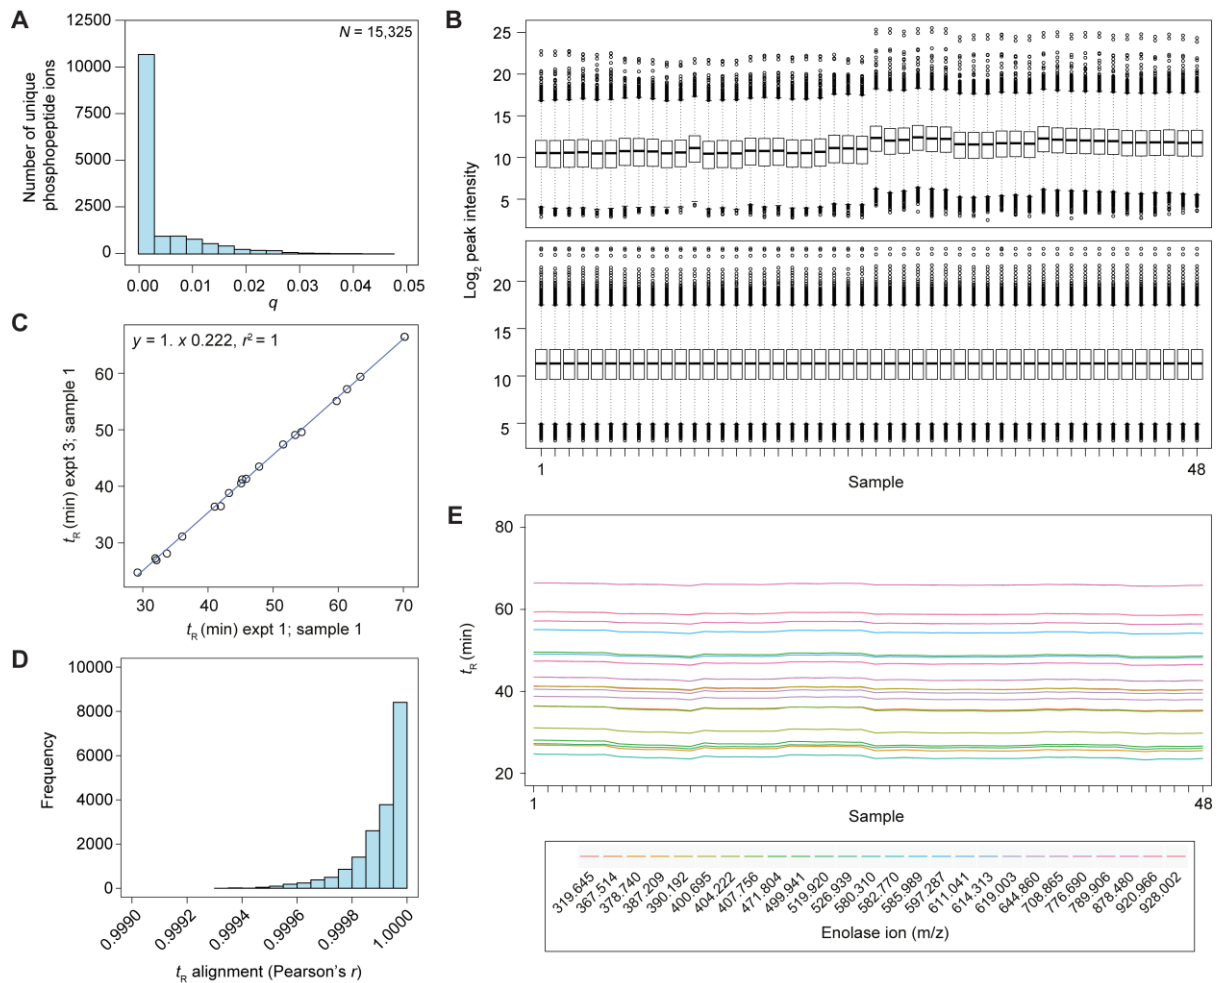

**Fig. S8. Data summary for the quantitative phosphoproteomics comparison of resistant cell-lines and parental cells.** This is a quality control analysis of the data shown in Fig. 4 in the main text. (A) Histogram showing the distribution of  $q$ -values within the phosphopeptide ion database (15,325 unique entries). (B) Box plots demonstrating the phosphopeptide ion  $\log_2$  intensity distributions for each sample pre- (top panel) and post-quantile normalization (bottom panel). (C) Illustrative example of an enolase peptide standard retention time ( $t_R$ ) alignment between two samples, one from the first, network-defining experiment (Fig S1 – expt 1) and one from the resistant cell-line comparison experiment (expt 3), in order to predict and account for retention time shifts. (D) Histogram showing the distribution of Pearson's correlation coefficients ( $r$ ) for linear models formed between each pair-wise peptide standard alignment in both the network-defining and resistant cell-line experiments. (E) Stability of enolase peptide standard retention times across the sample array. The color of each line is specific to a single enolase peptide ion (as denoted in the key).

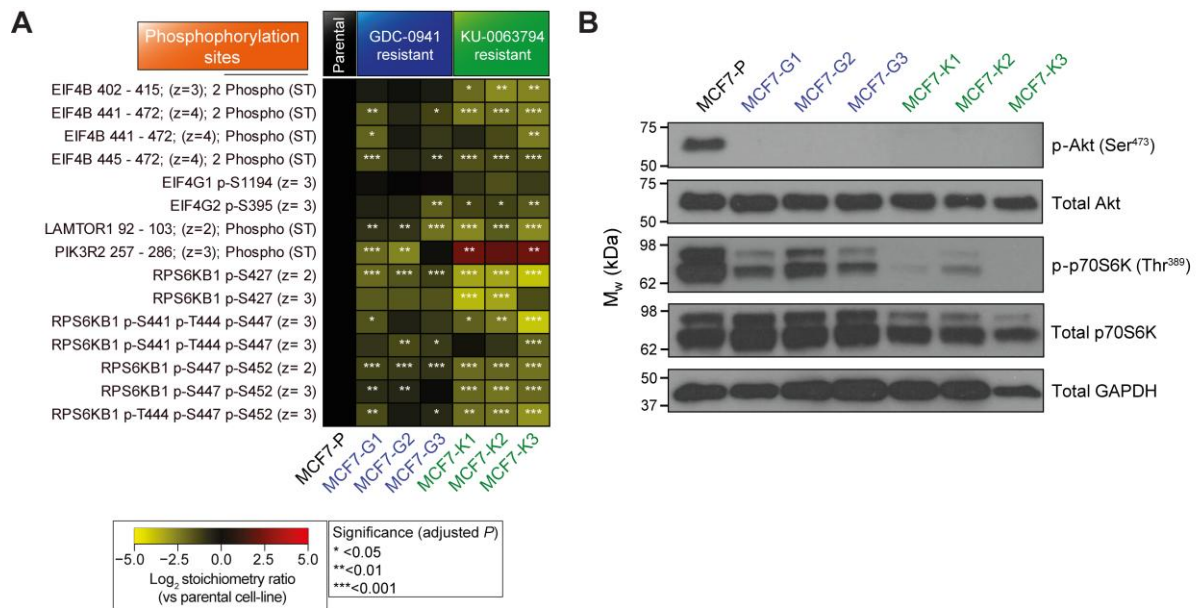

**Fig. S9. Illustrative examples of phosphorylation sites reported to be downstream of PI3K and mTORC1/2 in resistant cell-lines treated with inhibitors.** Heat map demonstrating the log<sub>2</sub> stoichiometry ratios (log<sub>2</sub> fold-ratio of the phosphorylation site/log<sub>2</sub> fold-ratio of the protein) vs the parental cell-line of several phosphorylation sites known to be downstream of PI3K and mTORC1/2. Phosphorylation sites possessing a Mascot delta score  $\geq 10$  are presented as the protein name, peptide charge (*z*)  $\pm$  any other peptide modifications. Those possessing a Mascot delta score  $\leq 10$  are represented as the protein name, residues between which the phosphorylation site resides, peptide charge, and the predicted modification. Asterisks indicate statistical significance (adjusted *P*-value) as outlined in the legend. (B) Western blots for known markers of Akt-mTOR-PI3K pathway activity.

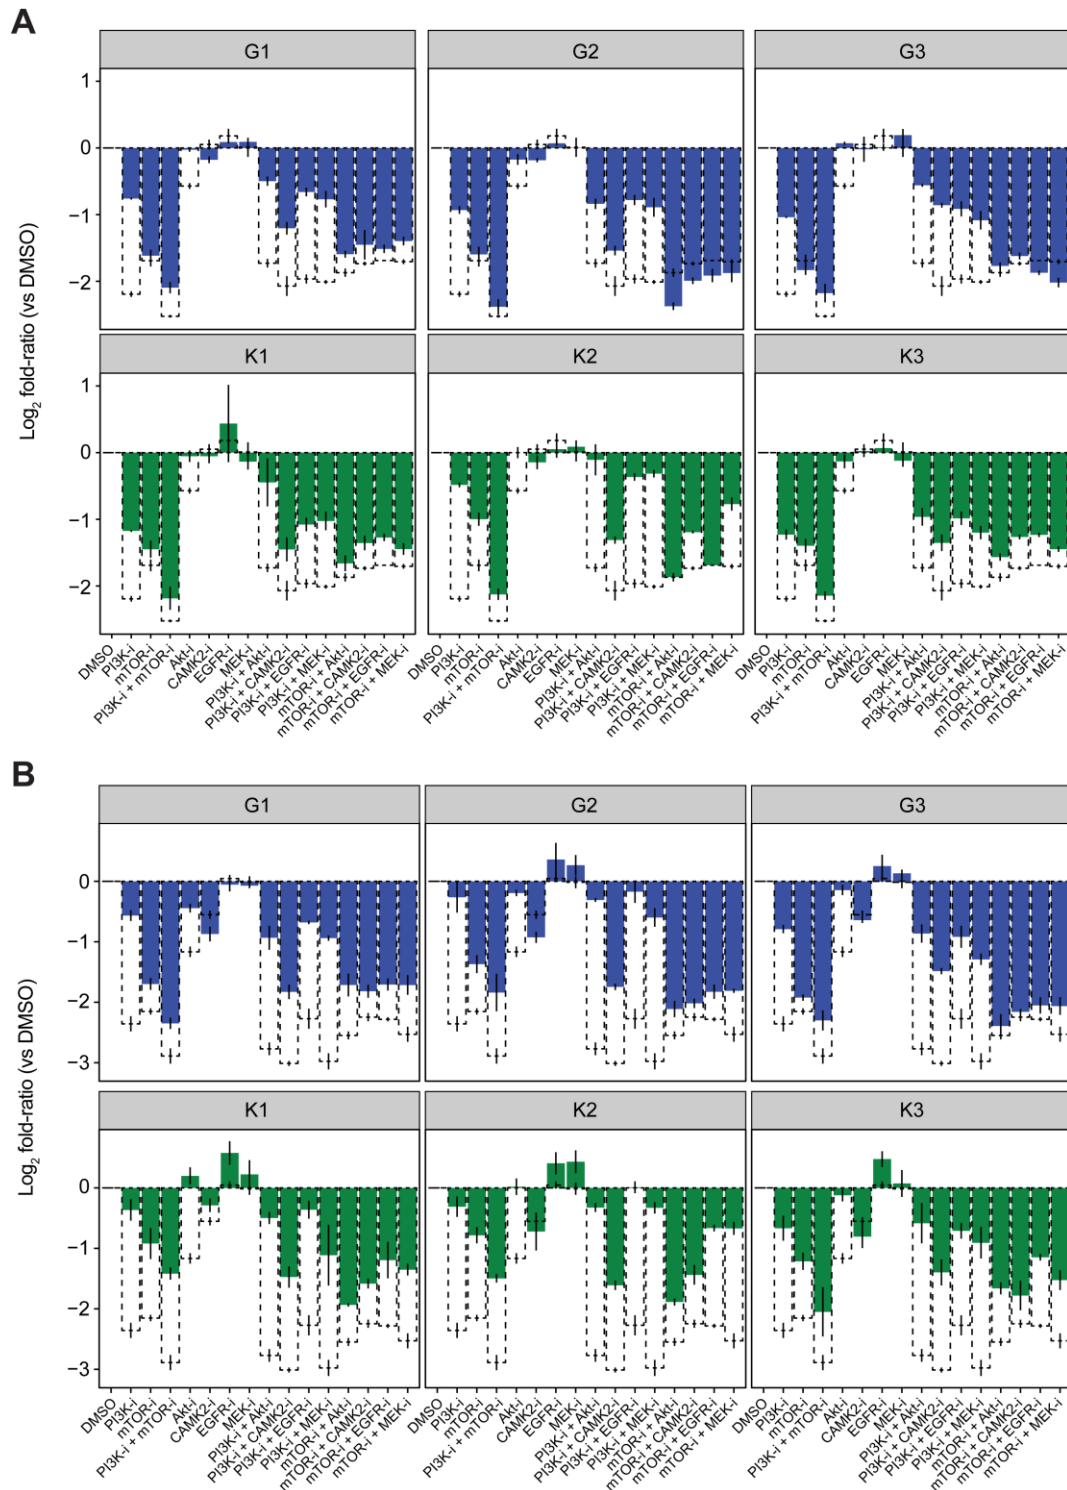

**Fig. S10. Cell viability data for the resistant and parental cell-lines treated with a panel of kinase inhibitors.** Bars represent mean  $\log_2$  fold-ratio of cell viability (vs DMSO) for each kinase inhibitor alone or in combination in each of the resistant cell-lines (MCF7-G, solid blue; MCF7-K, solid green; MCF7-P, dotted white) as determined by the MTS assay. Error bars represent standard deviation from the mean in each case ( $n = 3$ ). These data were the input for the PCA presented in Fig. 4E in the main text. PI3K-i = 1  $\mu$ M GDC-0941; mTOR-i = 1  $\mu$ M KU-0063794; Akt-i = 1  $\mu$ M MK-2206; CAMK2-i = 5  $\mu$ M KN-93; EGFR-i = 1  $\mu$ M PD-153035; MEK-i = 0.5  $\mu$ M GSK-1120212.

**Table S1. Small-molecule inhibitors used in the experiments**

| Inhibitor                   | Concentration used ( $\mu\text{M}$ ) | Primary target                                        | Off-targets from MRC database (>50% inhibition at given concentration)                                                                                                                                                                                | ChEMBL ID | Off-targets from ChEMBL                                                                         | Reference material |
|-----------------------------|--------------------------------------|-------------------------------------------------------|-------------------------------------------------------------------------------------------------------------------------------------------------------------------------------------------------------------------------------------------------------|-----------|-------------------------------------------------------------------------------------------------|--------------------|
| Akt inhibitor VIII          | 1                                    | Akt1/2/3                                              | CAMK1 (1 $\mu\text{M}$ )                                                                                                                                                                                                                              | 258844    | -                                                                                               | (20)               |
| MK-2206                     | 1                                    | Akt1/2/3                                              | -                                                                                                                                                                                                                                                     | 1079175   | -                                                                                               | (21, 22)           |
| KN-62                       | 5                                    | CAMK2 $\alpha$ / $\beta$ / $\gamma$ / $\delta$        | PRAK, CAMK1, DYRK1A, Lck (10 $\mu\text{M}$ )                                                                                                                                                                                                          | 155333    | P2RX7                                                                                           | (23)               |
| KN-93                       | 10                                   | CAMK2 $\alpha$ / $\beta$ / $\gamma$ / $\delta$        | TrkA, smMLCK (10 $\mu\text{M}$ )                                                                                                                                                                                                                      | 28234     | -                                                                                               | (24)               |
| PD-168393                   | 1                                    | EGFR                                                  | -                                                                                                                                                                                                                                                     | 285063    | ERBB2/4, BMX, BTK, BLK, JAK3                                                                    | (25)               |
| PD-153035                   | 10                                   | EGFR                                                  | -                                                                                                                                                                                                                                                     | 29197     | ABL1, ERBB2, MKNK1, F16P1                                                                       | (26)               |
| ERK inhibitor I             | 40                                   | ERK1/2                                                | -                                                                                                                                                                                                                                                     | 1403932   | -                                                                                               | (27)               |
| ERK inhibitor II (FR180204) | 30                                   | ERK1/2                                                | -                                                                                                                                                                                                                                                     | 259551    | MAPK14                                                                                          | (28)               |
| GSK-1120212                 | 0.5                                  | MEK1/2                                                | -                                                                                                                                                                                                                                                     | -         | -                                                                                               | (29, 30)           |
| U0126                       | 10                                   | MEK1/2                                                | MKK1 (10 $\mu\text{M}$ )                                                                                                                                                                                                                              | 100473    | -                                                                                               | (30, 31)           |
| KU-0063794                  | 1                                    | mTORC1/2                                              | -                                                                                                                                                                                                                                                     | 1078983   | -                                                                                               | (32)               |
| Torin-1                     | 1                                    | mTORC1/2                                              | -                                                                                                                                                                                                                                                     | 1256459   | PI3K $\alpha$ / $\delta$ / $\gamma$ , p85 $\alpha$ , PI3K-C2 $\alpha$ / $\beta$ , Vps34, DNA-PK | (33)               |
| PF-4708671                  | 20                                   | p70S6K (S6K1)                                         | MSK1, RSK1 (1 $\mu\text{M}$ )                                                                                                                                                                                                                         | -         | S6K $\alpha$ 5                                                                                  | (34)               |
| DG2                         | 5                                    | p70S6K (S6K1)                                         | -                                                                                                                                                                                                                                                     | 1254209   | -                                                                                               | (35)               |
| GDC-0941                    | 1                                    | PI3K (class I)                                        | CLK2 (1 $\mu\text{M}$ )                                                                                                                                                                                                                               | 573393    | Akt1, mTOR, HIPK2/3, MYLK4, CLK2, MAPK10, FLT3, JAK1, RIOK2                                     | (36, 37)           |
| PI-103                      | 1                                    | PI3K (class I)                                        | -                                                                                                                                                                                                                                                     | 521851    | mTOR, DNA-PK, Akt1                                                                              | (38)               |
| Gö-6976                     | 1                                    | PKC $\alpha$ / $\beta$ / $\delta$ / $\gamma$          | MKK1, BRSK2, ERK2/8, CAMKK $\alpha$ , MNK2, DYRK1A/3, SmMLCK, HIPK2, Aurora C, GSK3 $\beta$ , Aurora B, PIM1, MELK, AMPK, MARK3, CAMKK $\beta$ , S6K1, PDK1, CDK2, RSK1, PAK4/5/6, MSK1, PKD1, PIM3, RSK2, PRK2, PHK, CHK1, MST2 (0.1 $\mu\text{M}$ ) | 302449    | PKD1                                                                                            | (39)               |
| Bisindolylmaleimide-I       | 1                                    | PKC $\alpha$ / $\theta$ / $\eta$ / $\nu$ / $\epsilon$ | MKK1, ROCK2, Lck, PKA, Akt1, MAPKAP-K2, CHK1, PKD1, AMPK, S6K1, GSK3 $\beta$ , CDK2, SGK1, DYRK1A, MSK1, PHK, RSK1 (10 $\mu\text{M}$ )                                                                                                                | 7463      | CDK4/CCND1, GSK3 $\beta$ , PIM1                                                                 | (40)               |
| Okadaic acid                | 1                                    | PP2A                                                  | -                                                                                                                                                                                                                                                     | 280487    | -                                                                                               | (41)               |
| Cantharidic acid            | 10                                   | PP2A                                                  | -                                                                                                                                                                                                                                                     | 275516    | -                                                                                               | (42)               |
| H-1152                      | 5                                    | ROCK                                                  | MNK1, MARK3, MELK, EPH-A2, RSK2, MSK1, BRSK2, FGF-R1, PKA, AMPK, RSK1, PHK, Aurora B/C, PRK2 (1 $\mu\text{M}$ )                                                                                                                                       | 406821    | PKA                                                                                             | (43)               |
| Y-27632                     | 10                                   | ROCK                                                  | PHK, MST2, RSK2, MSK1, MNK1, RSK1, AMPK, PRK2 (1 $\mu\text{M}$ )                                                                                                                                                                                      | -         | PKC $\epsilon$                                                                                  | (44)               |



**Table S2. The identified CTAMs**

| <b>CTAM group</b>           | <b>Phosphorylation site</b> |
|-----------------------------|-----------------------------|
| Akt-CAMK2-EGFR-ERK-MEK-mTOR | PHF12(S977)                 |
| Akt-CAMK2-EGFR-ERK-MEK-mTOR | PRCC(S267)                  |
| Akt-CAMK2-EGFR-ERK-MEK-mTOR | SERPINA10(T297)             |
| Akt-CAMK2-EGFR-ERK-MEK-mTOR | SSFA2(S737+S739)            |
| Akt-CAMK2-EGFR-ERK-MEK      | EIF3G(T41+S42)              |
| Akt-CAMK2-EGFR-ERK-MEK      | JUND(S90)                   |
| Akt-CAMK2-EGFR-ERK-MEK      | PBK(T24+S32)                |
| Akt-CAMK2-EGFR-ERK-MEK      | RPLP2(S102+S105)            |
| Akt-CAMK2-EGFR-ERK-ROCK     | ANXA13(Y291+S294)           |
| Akt-CAMK2-ERK-MEK-mTOR      | USP13(S630)                 |
| Akt-CAMK2-mTOR-p70S6K-PI3K  | RICTOR(T1135+S1138)         |
| Akt-ERK-mTOR-p70S6K-PI3K    | ZNF687(S1118)               |
| Akt-mTOR-p70S6K-PI3K-PKC    | WWTR1(S93)                  |
| Akt-CAMK2-EGFR-ERK          | DSP(S38)                    |
| Akt-CAMK2-EGFR-ERK          | KAT7(T302+S303)             |
| Akt-CAMK2-EGFR-ERK          | KLF16(S230)                 |
| Akt-CAMK2-EGFR-ERK          | NOS1AP(S371+S374)           |
| Akt-CAMK2-EGFR-ERK          | PER2(S77)                   |
| Akt-CAMK2-EGFR-ERK          | TNKS1BP1(S494+S504)         |
| Akt-CAMK2-EGFR-mTOR         | PLEC(T4030)                 |
| Akt-CAMK2-EGFR-p70S6K       | GAPDH(T184)                 |
| Akt-CAMK2-ERK-MEK           | FBRSL1(T989+T1010)          |
| Akt-CAMK2-mTOR-PI3K         | EIF4EBP1(T41+S44)           |
| Akt-EGFR-ERK-mTOR           | DLGAP4(S973)                |
| Akt-mTOR-p70S6K-PI3K        | C10orf47(S43)               |
| Akt-mTOR-p70S6K-PI3K        | C2orf78(S624+S625)          |
| Akt-mTOR-p70S6K-PI3K        | CHD1(S1385)                 |
| Akt-mTOR-p70S6K-PI3K        | CHD1(S1387)                 |
| Akt-mTOR-p70S6K-PI3K        | CIC(S299)                   |
| Akt-mTOR-p70S6K-PI3K        | CLMN(S921)                  |
| Akt-mTOR-p70S6K-PI3K        | CNBP(S47)                   |
| Akt-mTOR-p70S6K-PI3K        | CTDSP2(S28)                 |
| Akt-mTOR-p70S6K-PI3K        | EHMT2(S232)                 |
| Akt-mTOR-p70S6K-PI3K        | EPRS(T956)                  |
| Akt-mTOR-p70S6K-PI3K        | GTPBP4(T201+T202)           |
| Akt-mTOR-p70S6K-PI3K        | HMGCR(S872)                 |
| Akt-mTOR-p70S6K-PI3K        | IFT122(Y146+S157)           |
| Akt-mTOR-p70S6K-PI3K        | KRT8(S477)                  |
| Akt-mTOR-p70S6K-PI3K        | MACF1(S1376)                |
| Akt-mTOR-p70S6K-PI3K        | MACF1(S1378)                |
| Akt-mTOR-p70S6K-PI3K        | MTDH(S494)                  |
| Akt-mTOR-p70S6K-PI3K        | MYO5A(S1652)                |
| Akt-mTOR-p70S6K-PI3K        | NEK9(S332)                  |
| Akt-mTOR-p70S6K-PI3K        | NOLC1(S686+S698)            |
| Akt-mTOR-p70S6K-PI3K        | PCBP2(S272)                 |
| Akt-mTOR-p70S6K-PI3K        | PLEC(S4406)                 |
| Akt-mTOR-p70S6K-PI3K        | PLEC(T4411)                 |
| Akt-mTOR-p70S6K-PI3K        | RBL2(S1138)                 |
| Akt-mTOR-p70S6K-PI3K        | RBM14(S618)                 |
| Akt-mTOR-p70S6K-PI3K        | RICTOR(T1135)               |
| Akt-mTOR-p70S6K-PI3K        | RPS6KB1(S427)               |
| Akt-mTOR-p70S6K-PI3K        | SART1(S448)                 |
| Akt-mTOR-p70S6K-PI3K        | SETD1A(S1171)               |
| Akt-mTOR-p70S6K-PI3K        | SPATS2L(S135)               |
| Akt-mTOR-p70S6K-PI3K        | UCK1(S253)                  |
| Akt-mTOR-p70S6K-PI3K        | WDHD1(S374)                 |
| Akt-mTOR-p70S6K-PI3K        | YBX1(S209)                  |
| Akt-mTOR-p70S6K-PI3K        | ZFP36L1(S334)               |
| p70S6K-PI3K-PKC-ROCK        | ZYX(S143)                   |
| Akt-CAMK2-EGFR              | ATG4B(S383)                 |
| Akt-CAMK2-EGFR              | DSP(T2612)                  |
| Akt-CAMK2-EGFR              | FAM177A1(S70+T71)           |
| Akt-CAMK2-EGFR              | LSR(S643+S646)              |
| Akt-CAMK2-EGFR              | MAP7D1(S834)                |
| Akt-CAMK2-EGFR              | NCOR2(S1018)                |
| Akt-CAMK2-EGFR              | NOTCH2(S1804)               |
| Akt-CAMK2-EGFR              | PTGES3(S148)                |
| Akt-CAMK2-EGFR              | RANBP2(S2628)               |
| Akt-CAMK2-EGFR              | RANGAP1(S428+S442)          |
| Akt-CAMK2-EGFR              | ROCK2(S1134+S1137)          |
| Akt-CAMK2-EGFR              | SMARCAD1(S124+S127)         |
| Akt-CAMK2-EGFR              | SRRM2(S1398+S1404)          |
| Akt-CAMK2-EGFR              | TRMT112(S119)               |
| Akt-CAMK2-EGFR              | YWHAQ(S230)                 |
| Akt-CAMK2-ERK               | GORASP2(T423+S451)          |

|                  |                          |
|------------------|--------------------------|
| Akt-CAMK2-ERK    | PRKCD(T507)              |
| Akt-EGFR-ERK     | AHNAK(S1298)             |
| Akt-EGFR-ERK     | MAP2K4(T391+S394)        |
| Akt-EGFR-ERK     | MAVS(S258)               |
| Akt-EGFR-ERK     | MCM3(S711+T722)          |
| Akt-EGFR-MEK     | RSF1(S1359+S1375)        |
| Akt-ERK-MEK      | PPP1R12A(T696)           |
| Akt-mTOR-PI3K    | AKT1S1(S183)             |
| Akt-mTOR-PI3K    | ARFGAP2(S368)            |
| Akt-mTOR-PI3K    | BAHD1(S121)              |
| Akt-mTOR-PI3K    | BCL7C(S126)              |
| Akt-mTOR-PI3K    | CCNL1(S335+S338)         |
| Akt-mTOR-PI3K    | CTTN(T440)               |
| Akt-mTOR-PI3K    | EEF2K(S71+S74)           |
| Akt-mTOR-PI3K    | EIF4EBP1(S65+T68)        |
| Akt-mTOR-PI3K    | EIF4EBP1(T37+T41)        |
| Akt-mTOR-PI3K    | EIF4EBP1(T68+T70)        |
| Akt-mTOR-PI3K    | EIF4EBP2(S65+T70)        |
| Akt-mTOR-PI3K    | EIF4EBP2(T70)            |
| Akt-mTOR-PI3K    | EIF4EBP2(Y34+T46)        |
| Akt-mTOR-PI3K    | FAM54A(S305)             |
| Akt-mTOR-PI3K    | FAM83H(S1024)            |
| Akt-mTOR-PI3K    | FOXK1(S249+S253)         |
| Akt-mTOR-PI3K    | FOXK1(S257)              |
| Akt-mTOR-PI3K    | FOXK2(S369)              |
| Akt-mTOR-PI3K    | FOXK2(S385)              |
| Akt-mTOR-PI3K    | GSK3B(S9)                |
| Akt-mTOR-PI3K    | LAMTOR1(S98)             |
| Akt-mTOR-PI3K    | LARP1(S1058)             |
| Akt-mTOR-PI3K    | LARP1(S774)              |
| Akt-mTOR-PI3K    | LIMA1(S230)              |
| Akt-mTOR-PI3K    | MYC(S62)                 |
| Akt-mTOR-PI3K    | MYCBP2(S2833)            |
| Akt-mTOR-PI3K    | PCBP1(S246)              |
| Akt-mTOR-PI3K    | PCBP1(S262)              |
| Akt-mTOR-PI3K    | PCBP1(S263)              |
| Akt-mTOR-PI3K    | PDE3B(S494)              |
| Akt-mTOR-PI3K    | PUM1(S209)               |
| Akt-mTOR-PI3K    | RITA(S248)               |
| Akt-mTOR-PI3K    | RN3L1(S44)               |
| Akt-mTOR-PI3K    | RPS6KB1(S447+S452)       |
| Akt-mTOR-PI3K    | SEC14L1(T234)            |
| Akt-mTOR-PI3K    | SUN2(S20)                |
| Akt-mTOR-PI3K    | TBX2(S657)               |
| Akt-mTOR-PI3K    | TP53BP1(S1430)           |
| Akt-mTOR-PI3K    | TPR(T650)                |
| Akt-mTOR-PI3K    | UBA1(S816)               |
| Akt-mTOR-PI3K    | USP32(S1361)             |
| Akt-mTOR-PI3K    | USP32(S1366+S1371)       |
| Akt-mTOR-PI3K    | VWA7(S305+S325)          |
| Akt-mTOR-PI3K    | WDHD1(S374+S383)         |
| Akt-mTOR-PI3K    | ZNF185(S64)              |
| EGFR-ERK-MEK     | INCENP(T145+S148)        |
| EGFR-PI3K-PKC    | SPTBN1(S2358)            |
| mTOR-p70S6K-PI3K | BOD1L1(S635)             |
| mTOR-p70S6K-PI3K | BOD1L1(S637)             |
| mTOR-p70S6K-PI3K | C14orf43(T698+S700+S718) |
| mTOR-p70S6K-PI3K | C5orf30(S167)            |
| mTOR-p70S6K-PI3K | F12(S335+T337)           |
| mTOR-p70S6K-PI3K | RBM14(S620)              |
| mTOR-p70S6K-PI3K | WWTR1(S89)               |
| p70S6K-PI3K-PKC  | ZYX(S142)                |
| Akt-CAMK2        | ARHGAP35(S975+S985)      |
| Akt-CAMK2        | CACNB1(T217+S228+Y242)   |
| Akt-CAMK2        | CARHSP1(S30+S32+S41)     |
| Akt-CAMK2        | DDHD1(T726+S727)         |
| Akt-CAMK2        | EEF1B2(S106)             |
| Akt-CAMK2        | FAM122B(S222+S245)       |
| Akt-CAMK2        | FBXW7(S396)              |
| Akt-CAMK2        | FKBP15(S1114)            |
| Akt-CAMK2        | FOXO3(S75)               |
| Akt-CAMK2        | FSBP(S191+S193+T204)     |
| Akt-CAMK2        | GIT2(S418+S421)          |
| Akt-CAMK2        | GPKOW(S471)              |
| Akt-CAMK2        | INCENP(T239)             |
| Akt-CAMK2        | KIAA0284(S951+S954)      |
| Akt-CAMK2        | KIAA1429(S138)           |
| Akt-CAMK2        | KLHDC4(S413+S418)        |
| Akt-CAMK2        | MAP2K4(S257)             |
| Akt-CAMK2        | MARK4(T214)              |
| Akt-CAMK2        | MAVS(S152+T163)          |

|             |                       |
|-------------|-----------------------|
| Akt-CAMK2   | MKL2(S207+T227)       |
| Akt-CAMK2   | NKX6-3(T8)            |
| Akt-CAMK2   | PARP4(T1119)          |
| Akt-CAMK2   | PRKACA(T198)          |
| Akt-CAMK2   | PRKACA(T202)          |
| Akt-CAMK2   | PRKCD(T511)           |
| Akt-CAMK2   | PRKCI(T410)           |
| Akt-CAMK2   | RAB11FIP2(S150)       |
| Akt-CAMK2   | RPUSD1(S271)          |
| Akt-CAMK2   | RRM2(S20)             |
| Akt-CAMK2   | SAP30BP(S18+S22)      |
| Akt-CAMK2   | SERHL2(T272)          |
| Akt-CAMK2   | SMN1(S28+S31)         |
| Akt-CAMK2   | STRN(S245)            |
| Akt-CAMK2   | TFG(S193+S197)        |
| Akt-CAMK2   | TOP2B(S1522+S1524)    |
| Akt-CAMK2   | TRIP12(S1317+S1322)   |
| Akt-CAMK2   | UBAP2L(S428)          |
| Akt-CAMK2   | UNC13D(S150)          |
| Akt-CAMK2   | WAPAL(S77)            |
| Akt-EGFR    | DCAF5(S648)           |
| Akt-EGFR    | EIF4G1(T205+T207)     |
| Akt-EGFR    | GAPVD1(S1105)         |
| Akt-EGFR    | KDM1A(T59)            |
| Akt-EGFR    | MFAP1(T267)           |
| Akt-EGFR    | PA2G4(S2+T11)         |
| Akt-EGFR    | PFDN4(S125)           |
| Akt-EGFR    | PXN(S126+S130)        |
| Akt-EGFR    | TNFRSF10A(S466)       |
| Akt-ERK     | AGAP2(S808)           |
| Akt-mTOR    | EP400(T1738)          |
| Akt-mTOR    | NSD1(S979)            |
| Akt-mTOR    | RAPGEF6(S1070)        |
| Akt-mTOR    | SERBP1(S392)          |
| Akt-mTOR    | UBA1(S816+S820)       |
| Akt-p70S6K  | BTF3(S161)            |
| Akt-p70S6K  | RAD18(S99)            |
| Akt-PI3K    | CCNL1(T325+S341+S342) |
| Akt-PI3K    | CDC42EP2(S109)        |
| Akt-PI3K    | FOXK1(S236+S257)      |
| Akt-PI3K    | GAPVD1(S566+S569)     |
| Akt-PI3K    | SEMA4B(S825)          |
| Akt-PI3K    | STIP1(S16)            |
| Akt-PKC     | YEATS2(T1149+T1165)   |
| CAMK2-EGFR  | NUP153(S209)          |
| CAMK2-EGFR  | SCRIB(S1306+S1309)    |
| CAMK2-EGFR  | SPICE1(S760+S764)     |
| CAMK2-EGFR  | TRIM28(S43)           |
| EGFR-ERK    | C14orf43(S700+S709)   |
| EGFR-MEK    | MAPK1(T185+Y187)      |
| EGFR-MEK    | RANBP2(S1869)         |
| EGFR-MEK    | TPR(S2155)            |
| EGFR-p70S6K | TMCC1(S382)           |
| ERK-mTOR    | C14orf43(S461)        |
| ERK-p70S6K  | RXRA(T23)             |
| MEK-PKC     | ERF(S532)             |
| mTOR-p70S6K | USP5(S785)            |
| mTOR-PI3K   | ATRX(S594)            |
| mTOR-PI3K   | ATRX(S598)            |
| mTOR-PI3K   | BCAS3(S838)           |
| mTOR-PI3K   | CTTN(S438)            |
| mTOR-PI3K   | EEF2K(S74)            |
| mTOR-PI3K   | FOXK2(T389+S392)      |
| mTOR-PI3K   | HDGFRP2(S454)         |
| mTOR-PI3K   | IBTK(Y996+S1004)      |
| mTOR-PI3K   | LARP1(S1056)          |
| mTOR-PI3K   | LARP4B(S568)          |
| mTOR-PI3K   | LIMA1(S225)           |
| mTOR-PI3K   | MAF1(S60+S68)         |
| mTOR-PI3K   | MKI67IP(S218+T240)    |
| mTOR-PI3K   | MREG(S213)            |
| mTOR-PI3K   | NDRG3(S331)           |
| mTOR-PI3K   | PCBP1(S264)           |
| mTOR-PI3K   | PLEKHA3(S244)         |
| mTOR-PI3K   | PXN(S137)             |
| mTOR-PI3K   | PXN(T136)             |
| mTOR-PI3K   | SPHKAP(T741)          |
| mTOR-PI3K   | USP24(S2561)          |
| mTOR-PI3K   | USP24(T2565)          |
| p70S6K-PI3K | AKAP11(S18)           |
| p70S6K-PI3K | CD2AP(S234)           |

|             |                         |
|-------------|-------------------------|
| p70S6K-PI3K | CPSF7(T67+Y72+S75)      |
| p70S6K-PI3K | FKBP15(S1012)           |
| p70S6K-PI3K | FKBP15(S346)            |
| p70S6K-PI3K | PFKFB2(S483)            |
| p70S6K-PKC  | EPS8L2(S459)            |
| p70S6K-PKC  | EPS8L2(S466)            |
| p70S6K-PKC  | OR1A1(T280+Y288)        |
| p70S6K-PKC  | TPD52(S176)             |
| p70S6K-PKC  | UBL7(S230)              |
| p70S6K-PKC  | YAP1(S61)               |
| PI3K-PKC    | KIAA1598(S249)          |
| PI3K-PKC    | NCBP1(S22)              |
| PI3K-PKC    | PAK2(S197)              |
| PI3K-PKC    | SCNN1D(S6)              |
| PKC-ROCK    | EMD(S173)               |
| Akt         | ACACA(S29)              |
| Akt         | AFTPH(S411)             |
| Akt         | AHNAK(S4360)            |
| Akt         | AHNAK(T4766)            |
| Akt         | AKAP13(S790)            |
| Akt         | ANK3(S1326+S1327+T1334) |
| Akt         | ANLN(S661)              |
| Akt         | ARAP1(S229)             |
| Akt         | ASXL2(S834+S842)        |
| Akt         | ATF2(S90)               |
| Akt         | ATXN2L(S559)            |
| Akt         | B4GALT1(S9+S11+S18)     |
| Akt         | BAG3(S377+S386)         |
| Akt         | BAG3(S385)              |
| Akt         | BAIAP2L1(T416)          |
| Akt         | BANP(S90)               |
| Akt         | BPTF(S1060+T1064)       |
| Akt         | BRD9(S588)              |
| Akt         | BZW2(S412+S414)         |
| Akt         | C17orf85(S25)           |
| Akt         | CAMSAP2(S611)           |
| Akt         | CAMSAP3(S1048)          |
| Akt         | CAMSAP3(S1048+S1051)    |
| Akt         | CBL(S452)               |
| Akt         | CCDC43(T139)            |
| Akt         | CCDC6(S254)             |
| Akt         | CCDC6(T436)             |
| Akt         | CHAMP1(S282)            |
| Akt         | CIC(S77)                |
| Akt         | CI21(T872)              |
| Akt         | CLIP1(S152)             |
| Akt         | CLNS1A(S197)            |
| Akt         | CP(T528)                |
| Akt         | CSTF2(S524)             |
| Akt         | CTNND1(T177)            |
| Akt         | CTPS1(S574+S575)        |
| Akt         | CYP2S1(T295+T304+T314)  |
| Akt         | DAP(S51)                |
| Akt         | DAXX(S688+S702)         |
| Akt         | DCAF5(S531)             |
| Akt         | DCP1A(S180)             |
| Akt         | DCTPP1(T170)            |
| Akt         | DIDO1(S898)             |
| Akt         | DIP2A(T279)             |
| Akt         | DIP2B(S153)             |
| Akt         | DNMT1(S394)             |
| Akt         | DPF2(Y172)              |
| Akt         | DSP(S2821+S2825)        |
| Akt         | DYNC1L1(S207)           |
| Akt         | EIF4G1(S204)            |
| Akt         | EIF4G1(T211)            |
| Akt         | EIF5B(S135+S137)        |
| Akt         | ERBB2IP(Y920+S932)      |
| Akt         | EXOC1(S501)             |
| Akt         | EXOSC9(S392+S394)       |
| Akt         | FAM102B(S320)           |
| Akt         | FGFR1OP(S160)           |
| Akt         | FKBP15(S311)            |
| Akt         | FKBP3(S152)             |
| Akt         | FLNA(S2163)             |
| Akt         | FTH1(S183)              |
| Akt         | FUBP1(S630)             |
| Akt         | FYTTD1(S23)             |
| Akt         | GAB2(T287)              |
| Akt         | GAPDH(T75)              |
| Akt         | GAPVD1(S569)            |

|     |                           |
|-----|---------------------------|
| Akt | GAPVD1(S758+S761)         |
| Akt | GATAD2B(S129+S135)        |
| Akt | GEMIN5(S778)              |
| Akt | GOLGB1(S17)               |
| Akt | GORASP2(S451)             |
| Akt | GRIPAP1(S692)             |
| Akt | GSG2(S179)                |
| Akt | GTF2(S679)                |
| Akt | GYS1(S727)                |
| Akt | HCFC1(S1507)              |
| Akt | HMGCS1(S495)              |
| Akt | HNRNPK(S116)              |
| Akt | INF2(S1149)               |
| Akt | KDM2A(S718)               |
| Akt | KDM2A(T713+S718+T720)     |
| Akt | KIAA0284(S655)            |
| Akt | KIAA1429(S133)            |
| Akt | KIAA1522(S161+T162)       |
| Akt | KIAA1731(S407+S411+T415)  |
| Akt | KLHL20(S263+T270+S273)    |
| Akt | KRT19(S10)                |
| Akt | LAD1(S121+S123)           |
| Akt | LARP4(S597)               |
| Akt | LRIG1(S1044)              |
| Akt | MACF1(S3927)              |
| Akt | MAP4(S507+T521)           |
| Akt | MCM3(S711)                |
| Akt | MCRS1(S282)               |
| Akt | MFF(T138)                 |
| Akt | MiIP(S303)                |
| Akt | MKI67(S2471)              |
| Akt | MKI67IP(T227)             |
| Akt | MKI67IP(T234+T238)        |
| Akt | MTMR3(S613)               |
| Akt | MTMR4(S610)               |
| Akt | MUC5AC(T2223+S2224+T2225) |
| Akt | MYL9(S20)                 |
| Akt | MYL9(T19+S20)             |
| Akt | NACA(S166)                |
| Akt | NAGK(S76)                 |
| Akt | NAP1L1(T39)               |
| Akt | NCAPG(S1015)              |
| Akt | NCOR2(S2057+S2065+S2068)  |
| Akt | NRP1(S894)                |
| Akt | NUCKS1(S19)               |
| Akt | NUMA1(S1945)              |
| Akt | NUMA1(T2106)              |
| Akt | NUP153(S343)              |
| Akt | OR6C65(T277+S278+Y288)    |
| Akt | PAK2(S141)                |
| Akt | PBRM1(S39)                |
| Akt | PDIA6(S428)               |
| Akt | PHF8(S857)                |
| Akt | PHKA1(S868+T877+S884)     |
| Akt | PHKA2(S1015)              |
| Akt | PKN1(T774)                |
| Akt | PKP3(S313+S314)           |
| Akt | POGZ(S333)                |
| Akt | PPP1R2(S87)               |
| Akt | PREX1(S319)               |
| Akt | PTGES3(S151)              |
| Akt | PXN(S340)                 |
| Akt | RAB11FIP1(S501)           |
| Akt | RAB11FIP5(S176)           |
| Akt | RAB3IP(S288)              |
| Akt | RABGEF1(Y601)             |
| Akt | RABL6(S425+S427)          |
| Akt | RAD21(S449)               |
| Akt | RAD50(T690)               |
| Akt | RAD9A(S277)               |
| Akt | RAI1(S683)                |
| Akt | RAI1(S924)                |
| Akt | RALGAPA1(S773)            |
| Akt | RALGAPA1(S797)            |
| Akt | RANBP2(S2263+S2270)       |
| Akt | RBBP6(S1277)              |
| Akt | RFFL(S240)                |
| Akt | RHBDL1(S193+S202+Y214)    |
| Akt | RPL24(T83)                |
| Akt | RPLP0(S304+S307)          |
| Akt | RPLP0(S307)               |

|       |                         |
|-------|-------------------------|
| Akt   | RPRD2(S976)             |
| Akt   | RPS17L(S113)            |
| Akt   | RPS17L(S115)            |
| Akt   | RPS6KA1(S221)           |
| Akt   | RWDD2B(T175)            |
| Akt   | SAC3D1(S402)            |
| Akt   | SAP30(S131+S138)        |
| Akt   | SAP30BP(S52)            |
| Akt   | SCAF1(S239)             |
| Akt   | SCAF1(S453)             |
| Akt   | SCAF1(T994+S997)        |
| Akt   | SCFD1(S373)             |
| Akt   | SCNM1(S183)             |
| Akt   | SCRIB(S1348)            |
| Akt   | SEC16A(S414+T415+S417)  |
| Akt   | SF1(S80+S82)            |
| Akt   | SF3B1(S129+T142)        |
| Akt   | SF3B2(T780)             |
| Akt   | SGSM1(S67)              |
| Akt   | SH2D3A(S125)            |
| Akt   | SIPA1L1(S174)           |
| Akt   | SIPA1L1(Y206+T209)      |
| Akt   | SLC3A2(S134)            |
| Akt   | SMARCA5(S66)            |
| Akt   | SMEK1(S771)             |
| Akt   | SMEK2(S840)             |
| Akt   | SNAPIN(S133)            |
| Akt   | SON(S1556)              |
| Akt   | SOX6(T180+S183)         |
| Akt   | SRRM2(S1401+S1404)      |
| Akt   | SSR3(S11)               |
| Akt   | STK24(T184)             |
| Akt   | STRN3(S257)             |
| Akt   | STRN4(S276)             |
| Akt   | SYAP1(S267)             |
| Akt   | TAB2(S524)              |
| Akt   | TBC1D10B(S656+S661)     |
| Akt   | TBC1D22A(S132)          |
| Akt   | TCF3(S134+S139)         |
| Akt   | TDRD7(S859)             |
| Akt   | TEX15(S194+S195+Y210)   |
| Akt   | TFDP1(S23)              |
| Akt   | TNS3(S776)              |
| Akt   | TP53BP1(S294)           |
| Akt   | TSC2(S1798)             |
| Akt   | TWF1(S143)              |
| Akt   | U2AF2(T119+T124+S142)   |
| Akt   | UBAP2L(T425)            |
| Akt   | UNG(T60)                |
| Akt   | UPF1(S1107)             |
| Akt   | USP13(T122)             |
| Akt   | USP32(S1423)            |
| Akt   | USP5(T623)              |
| Akt   | VAMP4(S30)              |
| Akt   | VT11B(S138)             |
| Akt   | WDHD1(S367)             |
| Akt   | YTHDF1(S291)            |
| Akt   | ZFC3H1(T823)            |
| Akt   | ZNF276(S599)            |
| Akt   | ZNHIT3(S80)             |
| Akt   | ZNRF1(S52+S53)          |
| Akt   | ZZEF1(S1518)            |
| CAMK2 | ARHGEF2(S151)           |
| CAMK2 | ARSI(Y263)              |
| CAMK2 | CAC1A(S2275+T2277)      |
| CAMK2 | CCDC86(S18+S21)         |
| CAMK2 | DNMT3A(S6+S7+T12)       |
| CAMK2 | HUWE1(S649)             |
| CAMK2 | JUND(S255+S259)         |
| CAMK2 | KCTD15(S35+S38)         |
| CAMK2 | MKI67IP(S230+T234+T238) |
| CAMK2 | PPP1R11(T109)           |
| CAMK2 | PRKCD(S664)             |
| CAMK2 | PTGES3(S113)            |
| CAMK2 | RPRD2(S628)             |
| CAMK2 | RRM2(S377)              |
| CAMK2 | SCRIB(S1439)            |
| CAMK2 | SMEK1(S117+S126)        |
| CAMK2 | TRIM33(T1102+S1105)     |
| EGFR  | AHNAK(S5448)            |
| EGFR  | ARHGAP17(S625)          |

|        |                        |
|--------|------------------------|
| EGFR   | EHMT2(S140)            |
| EGFR   | EIF4G1(S1092)          |
| EGFR   | FASN(T2204)            |
| EGFR   | GCFC1(S557+S558)       |
| EGFR   | GORASP2(T433)          |
| EGFR   | ITGB4(S1457)           |
| EGFR   | LSM14A(S178+S182)      |
| EGFR   | NSFL1C(S114)           |
| EGFR   | PDS5B(S1177)           |
| EGFR   | RIPK2(S363)            |
| EGFR   | SRRM1(S769+S775)       |
| EGFR   | SRRM2(S2118+S2121)     |
| EGFR   | TNRC6B(S1816)          |
| EGFR   | TOP2A(S1393)           |
| EGFR   | WNK2(S1862)            |
| ERK    | CEP128(S217)           |
| MEK    | AHCTF1(S1283)          |
| MEK    | BCL2L1(S77)            |
| MEK    | ERF(S327)              |
| MEK    | MAPK1(Y187)            |
| MEK    | MAPK3(Y204)            |
| mTOR   | ALKBH5(S361)           |
| mTOR   | ASAP2(S822)            |
| mTOR   | CASZ1(S741)            |
| mTOR   | DOS(S361)              |
| mTOR   | EIF4EBP1(S65)          |
| mTOR   | EIF4EBP1(T70)          |
| mTOR   | EIF4EBP1(Y34+T45)      |
| mTOR   | EIF4EBP2(T46)          |
| mTOR   | FA13B(S14)             |
| mTOR   | FOXK1(S441+S445)       |
| mTOR   | FOXK2(S428)            |
| mTOR   | HN1(S87+S88)           |
| mTOR   | KLF16(S224+S246)       |
| mTOR   | MKI67(S2223)           |
| mTOR   | MKI67(S2708)           |
| mTOR   | NDRG3(S333+S334)       |
| mTOR   | PHF2(S539)             |
| mTOR   | RPS10P5(S157)          |
| mTOR   | ULK1(S556)             |
| mTOR   | ULK1(S638)             |
| mTOR   | WIZ(S1146)             |
| mTOR   | ZFP106(S861)           |
| p70S6K | CELSR1(S1320)          |
| p70S6K | CIB3(T6+T9+Y16)        |
| p70S6K | CLSPN(S1289)           |
| p70S6K | ITLN2(S18)             |
| p70S6K | KRT18(S34)             |
| p70S6K | MAP6(S793)             |
| p70S6K | MAP7(S365)             |
| p70S6K | MED1(S953)             |
| p70S6K | PPP1R10(S591)          |
| p70S6K | PRKAG1(Y280+T284+T287) |
| p70S6K | RFX7(S1081)            |
| p70S6K | RHBDF1(S51)            |
| p70S6K | THRAP3(S682)           |
| p70S6K | WBP11(S237)            |
| p70S6K | WDHD1(S333)            |
| p70S6K | ZNF217(S795)           |
| PI3K   | AHNAK(S570)            |
| PI3K   | DLG5(S1075)            |
| PI3K   | DOCK7(S2131)           |
| PI3K   | EHBP1L1(S310)          |
| PI3K   | FAM102B(S350)          |
| PI3K   | FAM21C(S288)           |
| PI3K   | FBP2(T13)              |
| PI3K   | FKBP15(S344+S356)      |
| PI3K   | FOXK2(S369+S373)       |
| PI3K   | GGT5(S474)             |
| PI3K   | KLC1(S524)             |
| PI3K   | LARP1(S824)            |
| PI3K   | MUC5B(T490)            |
| PI3K   | PACS1(S355)            |
| PI3K   | PAK2(S141+T154)        |
| PI3K   | PKP3(S313)             |
| PI3K   | PREX1(S1179)           |
| PI3K   | PREX1(S1182)           |
| PI3K   | PUM1(S75)              |
| PI3K   | SPAG9(S203+T217)       |
| PI3K   | STMN1(S16)             |
| PI3K   | ULK1(S623)             |

|      |                  |
|------|------------------|
| PKC  | ABCF1(S140)      |
| PKC  | AHNAK(S5841)     |
| PKC  | ARFGAP1(T135)    |
| PKC  | CCDC88C(S1887)   |
| PKC  | CDC40(S45)       |
| PKC  | EIF4B(S442+S445) |
| PKC  | EIF4B(S459)      |
| PKC  | GOLGA5(S116)     |
| PKC  | MAP2K2(S26)      |
| PKC  | MARK3(S419)      |
| PKC  | MARK3(T530)      |
| PKC  | MKI67(S713)      |
| PKC  | NAA10(S182)      |
| PKC  | NAV1(S17)        |
| PKC  | NFATC2IP(S366)   |
| PKC  | NOP58(S502+S514) |
| PKC  | NPM1(S70)        |
| PKC  | NRBF2(S120)      |
| PKC  | NUP214(T1021)    |
| PKC  | OR5K4(T134)      |
| PKC  | PPP4R2(S224)     |
| PKC  | PVRL1(S422)      |
| PKC  | RANBP2(S1160)    |
| PKC  | SHANK1(S958)     |
| PKC  | SPTBN2(S2384)    |
| PKC  | TPT1(S46)        |
| PKC  | TRA2B(T201)      |
| PKC  | TWISTNB(S328)    |
| PKC  | YTHDC1(S424)     |
| ROCK | AAK1(S637)       |
| ROCK | AHNAK(S819)      |
| ROCK | DIP2A(S94)       |
| ROCK | DIP2B(S100)      |
| ROCK | DIP2B(Y98)       |
| ROCK | FBXW12(S286)     |
| ROCK | IQSEC1(S180)     |
| ROCK | MKI67(S1329)     |
| ROCK | MKI67(S1937)     |
| ROCK | MKI67(T1315)     |
| ROCK | MPRIP(S1014)     |
| ROCK | PPP1R12A(S445)   |
| ROCK | PPP1R12A(S903)   |
| ROCK | PPP1R13L(S134)   |
| ROCK | SAPCD2(T219)     |
| ROCK | SPECC1L(S887)    |
| ROCK | SPTBN1(S2341)    |
| ROCK | SVIL(T852)       |
| ROCK | SVIL(Y850)       |
| ROCK | WHSC2(S363)      |

## Other Supporting Information Files

Dataset S1

Dataset S2

Dataset S3



## Supplementary References

1. Casado P, *et al.* (2013) Kinase-substrate enrichment analysis provides insights into the heterogeneity of signaling pathway activation in leukemia cells. *Sci. Signal.* 6(268):rs6.
2. Montoya A, Beltran L, Casado P, Rodriguez-Prados JC, & Cutillas PR (2011) Characterization of a TiO(2) enrichment method for label-free quantitative phosphoproteomics. *Methods* 54(4):370-378.
3. Casado P & Cutillas PR (2011) A self-validating quantitative mass spectrometry method for assessing the accuracy of high-content phosphoproteomic experiments. *Mol. Cell. Proteomics* 10(1):M110 003079.
4. Cutillas PR & Vanhaesebroeck B (2007) Quantitative profile of five murine core proteomes using label-free functional proteomics. *Mol. Cell. Proteomics* 6(9):1560-1573.
5. Tsou CC, *et al.* (2010) IDEAL-Q, an automated tool for label-free quantitation analysis using an efficient peptide alignment approach and spectral data validation. *Mol. Cell. Proteomics* 9(1):131-144.
6. Mann B, *et al.* (2008) ProteinQuant Suite: a bundle of automated software tools for label-free quantitative proteomics. *Rapid Commun. Mass Spectrom.* 22(23):3823-3834.
7. Escher C, *et al.* (2012) Using iRT, a normalized retention time for more targeted measurement of peptides. *Proteomics* 12(8):1111-1121.
8. Bolstad BM, Irizarry RA, Astrand M, & Speed TP (2003) A comparison of normalization methods for high density oligonucleotide array data based on variance and bias. *Bioinformatics* 19(2):185-193.
9. Smyth GK (2004) Linear models and empirical bayes methods for assessing differential expression in microarray experiments. *Stat. Appl. Genet. Molec. Biol.* 3(1):Article3.
10. Smyth GK (2005) *Limma: linear models for microarray data* (Springer New York).
11. R Core Team (2013) R: A language and environment for statistical computing (R Foundation for Statistical Computing).
12. Wickham H (2009) *ggplot2: elegant graphics for data analysis* (Springer New York).
13. Warnes GR *et al.* (2013) *gplots: Various R programming tools for plotting data*.
14. Wickham H (2007) Reshaping data with the reshape package. *J. Stat. Softw.* 21(12):1-20.
15. Csardi G & Nepusz T (2006) The igraph software package for complex network research. *InterJournal Complex Systems*:1695.
16. Shannon P, *et al.* (2013) RCytoscape: tools for exploratory network analysis. *BMC Bioinformatics* 14:217.
17. Shannon P, *et al.* (2003) Cytoscape: a software environment for integrated models of biomolecular interaction networks. *Genome Res.* 13(11):2498-2504.
18. Gobbi A, *et al.* (2014) Fast randomization of large genomic datasets while preserving alteration counts. *Bioinformatics* 30(17):i617-623.
19. Kim SY & Volsky DJ (2005) PAGE: parametric analysis of gene set enrichment. *BMC Bioinformatics* 6:144.

20. Lindsley CW, *et al.* (2005) Allosteric Akt (PKB) inhibitors: discovery and SAR of isozyme selective inhibitors. *Bioorg. Med. Chem. Lett.* 15(3):761-764.
21. Rehan M, Beg MA, Parveen S, Damanhoury GA, & Zaher GF (2014) Computational insights into the inhibitory mechanism of human AKT1 by an orally active inhibitor, MK-2206. *PLoS ONE* 9(10):e109705.
22. Hirai H, *et al.* (2010) MK-2206, an allosteric Akt inhibitor, enhances the antitumor efficacy by standard chemotherapeutic agents or molecular targeted drugs in vitro and in vivo. *Mol. Cancer Ther.* 9(7):1956-1967.
23. Sumi M., *et al.* (1991) The newly synthesized selective Ca<sup>2+</sup>/calmodulin dependent protein kinase-II inhibitor KN-93 reduces dopamine contents in PC12H cells. *Biochem. Biophys. Res. Commun.* 181(3):968-975.
24. Tokumitsu H, *et al.* (1990) KN-62, 1-N,O-bis(5-isoquinolinesulfonyl)-N-methyl-L-tyrosyl-4-phenylpiperazin E, a specific inhibitor of Ca<sup>2+</sup>/calmodulin-dependent protein kinase-II. *J. Biol. Chem.* 265(8):4315-4320.
25. Fry DW, *et al.* (1998) Specific, irreversible inactivation of the epidermal growth factor receptor and erbB2, by a new class of tyrosine kinase inhibitor. *Proc. Natl. Acad. Sci. U.S.A.* 95(20):12022-12027.
26. Bos M, *et al.* (1997) PD153035, a tyrosine kinase inhibitor, prevents epidermal growth factor receptor activation and inhibits growth of cancer cells in a receptor number-dependent manner. *Clin. Cancer Res.* 3(11):2099-2106.
27. Hancock CN, *et al.* (2005) Identification of novel extracellular signal-regulated kinase docking domain inhibitors. *J. Med. Chem.* 48(14):4586-4595.
28. Ohori M, *et al.* (2005) Identification of a selective ERK inhibitor and structural determination of the inhibitor-ERK2 complex. *Biochem. Biophys. Res. Commun.* 336(1):357-363.
29. Gilmartin AG, *et al.* (2011) GSK1120212 (JTP-74057) Is an Inhibitor of MEK Activity and Activation with Favorable Pharmacokinetic Properties for Sustained In Vivo Pathway Inhibition. *Clin. Cancer Res.* 17(5):989-1000.
30. Roberts PJ & Der CJ (2007) Targeting the Raf-MEK-ERK mitogen-activated protein kinase cascade for the treatment of cancer. *Oncogene* 26(22):3291-3310.
31. Favata MF, *et al.* (1998) Identification of a novel inhibitor of mitogen-activated protein kinase kinase. *J. Biol. Chem.* 273(29):18623-18632 (1998).
32. Garcia-Martinez JM, *et al.* (2009) Ku-0063794 is a specific inhibitor of the mammalian target of rapamycin (mTOR). *Biochem. J.* 421(1):29-42.
33. Liu QS, *et al.* (2010) Discovery of 1-(4-(4-Propionylpiperazin-1-yl)-3-(trifluoromethyl)phenyl)-9-(quinolin-3-yl)benzo[h]1,6-naphthyridin-2(1H)-one as a Highly Potent, Selective Mammalian Target of Rapamycin (mTOR) Inhibitor for the Treatment of Cancer. *J. Med. Chem.* 53(19):7146-7155.
34. Pearce LR, *et al.* (2010) Characterization of PF-4708671, a novel and highly specific inhibitor of p70 ribosomal S6 kinase (S6K1). *Biochem. J.* 431(2):245-255.
35. Okuzumi T, *et al.* (2009) Inhibitor hijacking of Akt activation. *Nat. Chem. Biol.* 5(7):484-493.
36. Raynaud FI, *et al.* (2009) Biological properties of potent inhibitors of class I phosphatidylinositide 3-kinases: from PI-103 through PI-540, PI-620 to the oral agent GDC-0941. *Mol. Cancer Ther.* 8(7):1725-1738.
37. Miller TW, Rexer BN, Garrett JT, & Arteaga CL (2011) Mutations in the phosphatidylinositol 3-kinase pathway: role in tumor progression and therapeutic implications in breast cancer. *Breast Cancer Res.* 13(6):224.

38. Raynaud FI, *et al.* (2007) Pharmacologic characterization of a potent inhibitor of class I phosphatidylinositide 3-kinases. *Cancer Res.* 67(12):5840-5850.
39. Martinybaron G, *et al.* (1993) Selective inhibition of protein kinase C isozymes by the indolocarbazole Gö 6976. *J. Biol. Chem.* 268(13):9194-9197.
40. Toullec D, *et al.* (1991) The bisindolylmaleimide GF-109203X is a potent and selective inhibitor of protein kinase C. *J. Biol. Chem.* 266(24):15771-15781.
41. McCluskey A, Sim ATR, & Sakoff JA (2002) Serine-threonine protein phosphatase inhibitors: Development of potential therapeutic strategies. *J. Med. Chem.* 45(6):1151-1175.
42. Li YM & Casida JE (1992) Cantharidin-binding protein - identification as protein phosphatase-2A. *Proc. Natl. Acad. Sci. U.S.A.* 89(24):11867-11870.
43. Tamura M, *et al.* (2005) Development of specific Rho-kinase inhibitors and their clinical application. *Biochim. Biophys. Acta-Proteins and Proteomics* 1754(1-2):245-252.
44. Ishizaki T, *et al.* (2000) Pharmacological properties of Y-27632, a specific inhibitor of Rho-associated kinases. *Mol. Pharmacol.* 57(5):976-983.
